# Supplementary material
Source: publisher figshare collection journal article supplement (https://acs.figshare.com/ndownloader/files/4565335)

# Supporting Information

## 1,4-Fullerenols C<sub>60</sub>ArOH: Synthesis and Functionalization

Guan-Wu Wang,\* Yong-Ming Lu, and Zhong-Xiu Chen,  
*Hefei National Laboratory for Physical Sciences at Microscale and Department of  
Chemistry, University of Science and Technology of China, Hefei, Anhui 230026, P. R.  
China*  
*gwang@ustc.edu.cn*

|                                                                            |         |
|----------------------------------------------------------------------------|---------|
| Experimental procedures for the synthesis and spectral data of <b>2a-d</b> | S2-S4   |
| Experimental procedure for the synthesis and spectral data of <b>3a</b>    | S4      |
| Experimental procedure for the synthesis of <b>2a</b> from <b>3a</b>       | S4      |
| Experimental procedures for the synthesis of <b>6a-d</b>                   | S4-S5   |
| Experimental procedures for the synthesis and spectral data of <b>7a-d</b> | S5-S7   |
| Experimental procedures for the synthesis and spectral data of <b>8a-d</b> | S7-S9   |
| <sup>1</sup> H NMR spectrum of compound <b>2a</b>                          | S10     |
| <sup>13</sup> C NMR spectrum of compound <b>2a</b>                         | S11     |
| <sup>1</sup> H NMR spectrum of compound <b>2b</b>                          | S12     |
| <sup>13</sup> C NMR spectrum of compound <b>2b</b>                         | S13     |
| <sup>1</sup> H NMR spectrum of compound <b>2c</b>                          | S14-S15 |
| <sup>13</sup> C NMR spectrum of compound <b>2c</b>                         | S16     |
| <sup>1</sup> H NMR spectrum of compound <b>2d</b>                          | S17     |
| <sup>13</sup> C NMR spectrum of compound <b>2d</b>                         | S18     |
| <sup>1</sup> H NMR spectrum of compound <b>3a</b>                          | S19     |
| <sup>13</sup> C NMR spectrum of compound <b>3a</b>                         | S20     |
| <sup>1</sup> H NMR spectrum of compound <b>7a</b>                          | S21     |
| <sup>13</sup> C NMR spectrum of compound <b>7a</b>                         | S22     |
| <sup>1</sup> H NMR spectrum of compound <b>7b</b>                          | S23     |
| <sup>13</sup> C NMR spectrum of compound <b>7b</b>                         | S24     |
| <sup>1</sup> H NMR spectrum of compound <b>7c</b>                          | S25     |
| <sup>13</sup> C NMR spectrum of compound <b>7c</b>                         | S26     |
| <sup>1</sup> H NMR spectrum of compound <b>7d</b>                          | S27     |
| <sup>13</sup> C NMR spectrum of compound <b>7d</b>                         | S28     |
| <sup>1</sup> H NMR spectrum of compound <b>8a</b>                          | S29     |
| <sup>13</sup> C NMR spectrum of compound <b>8a</b>                         | S30     |
| <sup>1</sup> H NMR spectrum of compound <b>8b</b>                          | S31     |
| <sup>13</sup> C NMR spectrum of compound <b>8b</b>                         | S32     |
| <sup>1</sup> H NMR spectrum of compound <b>8c</b>                          | S33     |
| <sup>13</sup> C NMR spectrum of compound <b>8c</b>                         | S34     |
| <sup>1</sup> H NMR spectrum of compound <b>8d</b>                          | S35     |
| <sup>13</sup> C NMR spectrum of compound <b>8d</b>                         | S36     |

**Synthesis of Fullerenols 2a-d from the Reactions of C<sub>60</sub> with Phenylhydrazine Hydrochlorides 1a-d and Sodium Nitrite in the Presence of H<sub>2</sub>O.** A 50-mL round-bottomed flask containing a mixture of C<sub>60</sub> (36.0 mg, 0.05 mmol), **1a** (**1b**, **1c** or **1d**, 0.1 mmol), and sodium nitrite (6.9 mg, 0.1 mmol) in toluene (25 mL) was ultrasonically treated to dissolve the reagents, and then 1 mL of H<sub>2</sub>O was added. The resulting solution was stirred vigorously in an oil bath preset at 50 °C. The reaction was monitored by thin-layer chromatography (TLC) and stopped at the desired time. After the solvent was evaporated *in vacuo*, the residue was separated on a silica gel column with carbon disulfide as the eluent to give unreacted C<sub>60</sub>, then with toluene/carbon disulfide as the eluent to afford fullereneol **2a** (**2b**, **2c** or **2d**).

The spectral data of fullerenols **2a-d** are listed below.

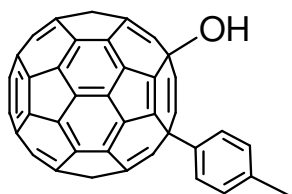

1-Hydroxy-4-(4-methylphenyl)-1,4-dihydro[60]fullerene (**2a**): <sup>1</sup>H NMR (300 MHz, CS<sub>2</sub>/CDCl<sub>3</sub>) δ 2.50 (s, 3H), 3.77 (s, 1H), 7.40 (d, *J* = 8.1 Hz, 2H), 8.15 (d, *J* = 8.1 Hz, 2H); <sup>13</sup>C NMR (75 MHz, CS<sub>2</sub>/DMSO-*d*<sub>6</sub> with Cr(acac)<sub>3</sub> as relaxation agent, all 1C unless indicated) δ 20.44 (CH<sub>3</sub>), 60.03 (*sp*<sup>3</sup>-C of C<sub>60</sub>), 74.31 (*sp*<sup>3</sup>-C of C<sub>60</sub>), 126.96 (2C, aryl C), 129.10 (2C, aryl C), 136.19, 136.50, 136.58, 137.31, 137.36, 138.07, 139.42, 139.85, 140.88, 141.02, 141.06, 141.23, 141.56 (4C), 141.63, 141.76, 141.79 (2C), 141.82, 142.04, 142.12 (2C), 142.57 (3C), 142.70 (2C), 142.76, 142.89 (2C), 143.05, 143.08 (2C), 143.21, 143.28, 143.37, 143.70, 143.83, 144.09, 144.18, 144.31, 145.13, 145.19, 145.28, 145.55, 145.64, 145.67, 145.89, 146.26, 146.37, 146.46, 147.16, 147.48, 148.39, 149.54, 151.96, 152.62, 153.01; FT-IR ν/cm<sup>-1</sup> (KBr) 2951, 2921, 1559, 1510, 1462, 1431, 1377, 1189, 1083, 1023, 934, 900, 820, 775, 764, 590, 565, 529; UV-vis (CHCl<sub>3</sub>) λ<sub>max</sub>/nm (log ε) 260 (5.08), 328 (4.56), 440 (3.84); HRMS (+ESI): calcd. for C<sub>67</sub>H<sub>8</sub>NaO [M+Na]<sup>+</sup> 851.0473, found 851.0467.

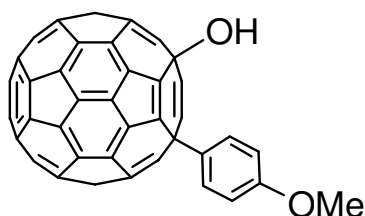

1-Hydroxy-4-(4-methoxyphenyl)-1,4-dihydro[60]fullerene (**2b**): <sup>1</sup>H NMR (300 MHz, CS<sub>2</sub>/CDCl<sub>3</sub>) δ 3.89 (s, 4H), 7.10 (d, *J* = 8.7 Hz, 2H), 8.17 (d, *J* = 8.7 Hz, 2H); <sup>13</sup>C NMR (75 MHz, CS<sub>2</sub>/DMSO-*d*<sub>6</sub> with Cr(acac)<sub>3</sub> as relaxation agent, all 1C unless indicated) δ 54.32 (OCH<sub>3</sub>), 59.70 (*sp*<sup>3</sup>-C of C<sub>60</sub>), 74.28 (*sp*<sup>3</sup>-C of C<sub>60</sub>), 113.83 (2C, aryl C), 128.22 (2C, aryl C), 131.15 (aryl C), 136.58, 137.40, 137.42, 138.07, 139.47,

139.90, 140.92, 141.06, 141.11, 141.27, 141.57 (2C), 141.60, 141.62, 141.69 (2C), 141.78, 141.81, 141.86, 142.09, 142.16 (2C), 142.59, 142.60, 142.61, 142.74, 142.75, 142.80, 142.93, 142.94, 143.09, 143.11 (2C), 143.23, 143.32, 143.42, 143.72, 143.88, 144.14, 144.22, 144.36, 145.19, 145.22, 145.32, 145.59, 145.67, 145.71, 145.92, 146.19, 146.41, 146.50, 147.19, 147.51, 148.34, 149.66, 151.91, 152.81, 152.97, 158.30 (aryl C); FT-IR  $\nu/\text{cm}^{-1}$  (KBr) 2949, 2921, 1604, 1507, 1460, 1429, 1300, 1251, 1180, 1081, 1026, 934, 899, 840, 825, 776, 644, 588, 545, 526; UV-vis ( $\text{CHCl}_3$ )  $\lambda_{\text{max}}/\text{nm}$  ( $\log \epsilon$ ) 257 (5.12), 328 (4.56), 441 (3.85); HRMS (+ESI): calcd. for  $\text{C}_{67}\text{H}_8\text{NaO}_2$   $[\text{M}+\text{Na}]^+$  867.0422, found 867.0412.

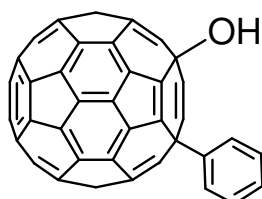

1-Hydroxyl-4-phenyl-1,4-dihydro[60]fullerene (**2c**):  $^1\text{H}$  NMR (300 MHz,  $\text{CS}_2/\text{CDCl}_3$ )  $\delta$  3.88 (s, 1H), 7.50 (t,  $J = 7.5$  Hz, 1H), 7.64 (t,  $J = 7.5$  Hz, 2H), 8.32 (d,  $J = 7.5$  Hz, 2H);  $^1\text{H}$  NMR (300 MHz,  $\text{CS}_2/\text{DMSO}-d_6$ )  $\delta$  7.44 (t,  $J = 7.6$  Hz, 1H), 7.58 (t,  $J = 7.6$  Hz, 2H), 8.05 (s, 1H), 8.29 (d,  $J = 7.6$  Hz, 2H);  $^{13}\text{C}$  NMR (75 MHz,  $\text{CS}_2/\text{DMSO}-d_6$  with  $\text{Cr}(\text{acac})_3$  as relaxation agent, all 1C unless indicated)  $\delta$  60.36 ( $sp^3$ -C of  $\text{C}_{60}$ ), 74.46 ( $sp^3$ -C of  $\text{C}_{60}$ ), 127.20 (2C, aryl C), 127.30 (aryl C), 128.56 (2C, aryl C), 136.78, 137.46, 137.64, 138.17, 139.14, 139.61, 140.01, 141.03, 141.19, 141.20, 141.39, 141.70, 141.71 (2C), 141.75 (2C), 141.94 (2C), 141.98, 142.04, 142.21, 142.27 (2C), 142.71 (3C), 142.83 (2C), 142.90, 142.99, 143.04, 143.19, 143.23 (2C), 143.37, 143.42, 143.49, 143.84, 144.03, 144.25, 144.35, 144.47, 145.27, 145.36, 145.44, 145.71, 145.79, 145.84, 146.03, 146.38, 146.51, 146.59, 147.33, 147.63, 148.52, 149.47, 152.03, 152.51, 152.81; FT-IR  $\nu/\text{cm}^{-1}$  (KBr) 2950, 2920, 2850, 1598, 1492, 1461, 1446, 1429, 1187, 1154, 1102, 1091, 1080, 1021, 933, 898, 762, 734, 692, 579, 559, 545, 527; UV-vis ( $\text{CHCl}_3$ )  $\lambda_{\text{max}}/\text{nm}$  ( $\log \epsilon$ ) 259 (5.08), 328 (4.56), 440 (3.83); HRMS (+ESI): calcd. for  $\text{C}_{66}\text{H}_6\text{NaO}$   $[\text{M}+\text{Na}]^+$  837.0316, found 837.0305.

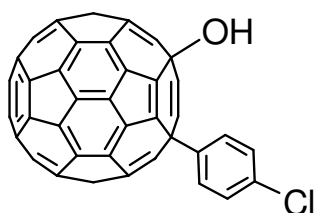

1-(4-Chlorophenyl)-4-hydroxyl-1,4-dihydro[60]fullerene (**2d**):  $^1\text{H}$  NMR (300 MHz,  $\text{CS}_2/\text{CDCl}_3$ )  $\delta$  3.91 (s, 1H), 7.57 (d,  $J = 8.4$  Hz, 2H), 8.25 (d,  $J = 8.4$  Hz, 2H);  $^{13}\text{C}$  NMR (75 MHz,  $\text{CS}_2/\text{DMSO}-d_6$  with  $\text{Cr}(\text{acac})_3$  as relaxation agent, all 1C unless indicated)  $\delta$  59.14 ( $sp^3$ -C of  $\text{C}_{60}$ ), 73.99 ( $sp^3$ -C of  $\text{C}_{60}$ ), 128.27 (2C, aryl C), 128.42 (2C, aryl C), 136.47 (aryl C), 137.06, 137.35, 137.42, 137.58, 139.27, 139.60, 140.59, 140.76 (2C), 140.97, 141.22, 141.32 (4C), 141.41, 141.51, 141.56 (2C), 141.81 (2C), 141.87 (2C), 142.19, 142.30 (2C), 142.38 (2C), 142.47 (2C), 142.61, 142.72 (2C),

142.84, 142.93, 142.98 (2C), 143.39, 143.68, 143.84, 143.96, 144.08, 144.81, 144.97, 145.04, 145.31, 145.38, 145.45, 145.61, 145.78, 145.97, 146.09, 146.95, 147.22, 148.08, 148.50, 151.44, 151.62, 151.65; FT-IR  $\nu/\text{cm}^{-1}$  (KBr) 2951, 2920, 2851, 1488, 1461, 1429, 1400, 1186, 1093, 1015, 897, 840, 822, 769, 622, 588, 561, 527; UV-vis ( $\text{CHCl}_3$ )  $\lambda_{\text{max}}/\text{nm}$  ( $\log \epsilon$ ) 257 (4.96), 328 (4.43), 440 (3.66); HRMS (+ESI): calcd. for  $\text{C}_{66}\text{H}_5\text{NaClO}$   $[\text{M}+\text{Na}]^+$  870.9927, found 870.9911.

**Synthesis of Intermediate 3a from the Reactions of  $\text{C}_{60}$  with 4-Methylphenylhydrazine Hydrochloride 1a and Sodium Nitrite in the Presence of  $\text{H}_2\text{O}$ .** To a 50-mL round-bottomed flask was charged with  $\text{C}_{60}$  (36.0 mg, 0.05 mmol), 4-methylphenylhydrazine hydrochloride (31.7 mg, 0.1 mmol) and sodium nitrite (6.9 mg, 0.1 mmol). After they were dissolved in toluene (25 mL) by sonication, 1 mL of  $\text{H}_2\text{O}$  was added. The mixture was heated with slow stirring in an oil bath preset at 50 °C for 2 h. After the solvent was evaporated *in vacuo*, the residue was separated on a silica gel column with carbon disulfide as the eluent to give unreacted  $\text{C}_{60}$  and intermediate **3a**.

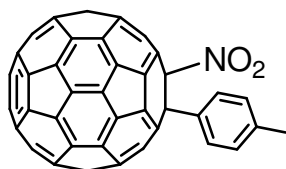

1-(4-Methylphenyl)-2-nitro-1,2-dihydro[60]fullerene (**3a**):  $^1\text{H}$  NMR (300 MHz,  $\text{CS}_2/\text{CDCl}_3$ )  $\delta$  2.52 (s, 3H), 7.46 (d,  $J = 8.1$  Hz, 2H), 8.30 (d,  $J = 8.1$  Hz, 2H);  $^{13}\text{C}$  NMR (75 MHz,  $\text{CS}_2/\text{CDCl}_3$  with  $\text{Cr}(\text{acac})_3$  as relaxation reagent, all 2C unless indicated)  $\delta$  21.06 (1C,  $\text{CH}_3$ ), 69.29 (1C,  $sp^3\text{-C}$  of  $\text{C}_{60}$ ), 106.46 (1C,  $sp^3\text{-C}$  of  $\text{C}_{60}$ ), 129.25 (aryl C), 129.92 (aryl C), 134.68, 135.83 (1C, aryl C), 137.67, 138.84 (1C, aryl C), 138.97, 140.04, 140.92, 141.02, 141.20, 141.80 (4C), 141.94, 142.20, 142.42, 142.64, 143.63, 143.94, 144.06, 144.16, 144.30, 144.93 (6C), 145.13, 145.87 (4C), 146.11 (4C), 146.28, 147.42 (1C), 147.91 (1C), 152.33; FT-IR  $\nu/\text{cm}^{-1}$  (KBr) 2917, 1556, 1507, 1431, 1341, 1187, 1021, 805, 780, 720, 577, 527, 476; UV-vis ( $\text{CHCl}_3$ )  $\lambda_{\text{max}}/\text{nm}$  ( $\log \epsilon$ ) 255 (5.08), 320 (4.64), 420 (3.67), 688 (2.48); HRMS (+ESI): calcd. for  $\text{C}_{67}\text{H}_7\text{NaNO}_2$   $[\text{M}+\text{Na}]^+$  880.0374, found 880.0387.

**Synthesis of Fullerenol 2a from the Reaction of Intermediate 3a with  $\text{H}_2\text{O}$ .** Into a 25-mL round-bottomed flask was added intermediate **3a** (5.0 mg),  $\text{H}_2\text{O}$  (1 mL), and toluene (5 mL). The mixture was heated and stirred in an oil bath preset at 50 °C for 36 h. After the solvent was evaporated *in vacuo*, the residue was separated on a silica gel column with toluene/carbon disulfide as the eluent to afford fullerenol **2a** (2.1 mg, 43%).

**Acetylation of Fullerenols 2a-d in the Presence of *p*-Toluenesulfonic Acid.** A mixture of fullerenol **2a** (**2b**, **2c** or **2d**, 10.0 mg), acetic anhydride (2 equiv.), and *p*-toluenesulfonic acid (2 equiv.) was dissolved in  $\text{CS}_2$  (10 mL) and heated with stirring in an oil bath preset at 80 °C. The reaction was monitored by TLC and stopped

at the desired time. After the solvent was evaporated *in vacuo*, the residue was separated on a silica gel column with carbon disulfide as the eluent to afford compound **6a** (**6b**, **6c** or **6d**, then with carbon disulfide/toluene as the eluent to afford unreacted fullerene **2a** (**2b**, **2c** or **2d**). The spectral data were consistent with those previously reported by us.<sup>1</sup>

**Methoxylation of Fullerenols 2a-d in the Presence of *p*-Toluenesulfonic Acid.** To a 25-mL round-bottomed flask equipped with a reflux condenser were added fullerene **2a** (**2b**, **2c** or **2d**, 10.0 mg), *p*-toluenesulfonic acid (5 equiv.), and a mixture of 1,4-dioxane-CS<sub>2</sub>-MeOH (16 mL : 8 mL : 8 mL). The resulted solution was ultrasonically treated and stirred in an oil bath preset at 100 °C. The reaction was monitored by TLC and stopped at the desired time. After the solvent was evaporated *in vacuo*, the residue was separated on a silica gel column with carbon disulfide as the eluent to afford compound **7a** (**7b**, **7c** or **7d**), then with carbon disulfide/toluene as the eluent to afford unreacted fullerene **2a** (**2b**, **2c** or **2d**).

**Synthesis of Methoxylated Fullerene 7a from the Reaction of Intermediate 3a with Methanol.** Into a 25-mL round-bottomed flask was added intermediate **3a** (5.0 mg), MeOH (1 mL), and anhydrous toluene (5 mL). The mixture was heated and stirred in an oil bath preset at 50 °C for 36 h. After the solvent was evaporated *in vacuo*, the residue was separated on a silica gel column with carbon disulfide as the eluent to afford methoxylated fullerene **7a** (3.5 mg, 71%).

The spectral data of compounds **7a-d** are listed below.

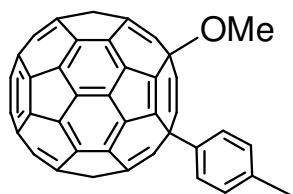

1-Methoxy-4-(4-methylphenyl)-1,4-dihydro[60]fullerene (**7a**): <sup>1</sup>H NMR (300 MHz, CS<sub>2</sub>/DMSO-*d*<sub>6</sub>) δ 2.58 (s, 3H), 4.23 (s, 3H), 7.47 (d, *J* = 8.0 Hz, 2H), 8.18 (d, *J* = 8.0 Hz, 2H); <sup>13</sup>C NMR (75 MHz, CS<sub>2</sub>/DMSO-*d*<sub>6</sub>, all 1C unless indicated) δ 20.80 (CH<sub>3</sub>), 53.81 (OCH<sub>3</sub>), 60.54 (*sp*<sup>3</sup>-C of C<sub>60</sub>), 80.38 (*sp*<sup>3</sup>-C of C<sub>60</sub>), 127.04 (2C, aryl C), 129.60 (2C, aryl C), 136.33 (aryl C), 136.78, 137.21 (aryl C), 137.29, 138.89, 139.33, 139.50, 140.08, 140.27, 141.39, 141.52, 141.63, 141.72, 141.90 (2C), 142.07, 142.08, 142.14, 142.30, 142.34, 142.49 (3C), 142.57, 142.62, 142.67, 143.15, 143.29, 143.31, 143.35, 143.38, 143.40, 143.46, 143.47, 143.51, 143.64, 143.70, 143.89, 144.04, 144.25, 144.76, 144.92 (2C), 145.70, 145.77, 145.88, 145.91, 146.13, 146.16, 146.19, 146.35, 146.39, 146.53, 147.03, 147.63, 148.12, 148.48, 151.97, 153.42, 153.64; FT-IR ν/cm<sup>-1</sup> (KBr) 2921, 1508, 1454, 1431, 1187, 1092, 1061, 984, 763, 582, 562, 527; UV-vis (CHCl<sub>3</sub>) λ<sub>max</sub>/nm (log ε) 255 (5.05), 327 (4.51), 439 (3.81), 690 (2.25); HRMS (MALDI-TOF): calcd. for C<sub>67</sub>H<sub>7</sub> [M-CH<sub>3</sub>O] 811.0548, found 811.0546.

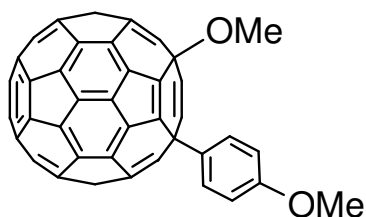

1-Methoxy-4-(4-methoxyphenyl)-1,4-dihydro[60]fullerene (**7b**):  $^1\text{H}$  NMR (300 MHz,  $\text{CS}_2/\text{DMSO}-d_6$ )  $\delta$  3.97 (s, 3H), 4.24 (s, 3H), 7.17 (d,  $J = 8.7$  Hz, 2H), 8.20 (d,  $J = 8.7$  Hz, 2H);  $^{13}\text{C}$  NMR (75 MHz,  $\text{CS}_2/\text{DMSO}-d_6$  with  $\text{Cr}(\text{acac})_3$  as relaxation reagent, all 1C unless indicated)  $\delta$  53.27 ( $\text{OCH}_3$ ), 54.19 ( $\text{OCH}_3$ ), 59.31 ( $sp^3\text{-C}$  of  $\text{C}_{60}$ ), 79.47 ( $sp^3\text{-C}$  of  $\text{C}_{60}$ ), 113.65 (2C, aryl C), 127.45 (2C, aryl C), 130.33 (aryl C), 135.86, 136.39, 137.99, 138.50 (2C), 139.18, 139.38, 140.50, 140.63, 140.75, 140.83, 141.03 (2C), 141.15, 141.18, 141.26, 141.41, 141.43, 141.60 (3C), 141.67, 141.73, 141.79, 142.26, 142.42, 142.44, 142.47, 142.50 (2C), 142.57 (2C), 142.63, 142.74, 142.81, 143.02, 143.14, 143.36, 143.86, 144.04 (2C), 144.80, 144.90, 144.99 (2C), 145.24, 145.26, 145.30, 145.46, 145.50, 145.56, 146.15, 146.74, 147.23, 147.54, 151.16, 152.70, 152.76, 158.02 (aryl C); FT-IR  $\nu/\text{cm}^{-1}$  (KBr) 2921, 1603, 1505, 1457, 1430, 1299, 1250, 1178, 1091, 1059, 1034, 982, 924, 898, 838, 823, 762, 643, 583, 565, 527; UV-vis ( $\text{CHCl}_3$ )  $\lambda_{\text{max}}/\text{nm}$  ( $\log \epsilon$ ) 257 (5.08), 327 (4.55), 439 (3.83), 688 (2.44); HRMS (MALDI-TOF): calcd. for  $\text{C}_{67}\text{H}_7\text{O}$  [ $\text{M}-\text{CH}_3\text{O}$ ] 827.0497, found 827.0496.

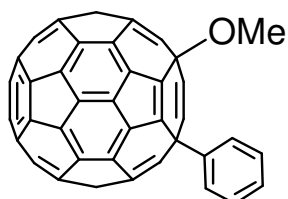

1-Methoxy-4-phenyl-1,4-dihydro[60]fullerene (**7c**):  $^1\text{H}$  NMR (300 MHz,  $\text{CS}_2/\text{DMSO}-d_6$ )  $\delta$  4.25 (s, 3H), 7.56 (t,  $J = 7.5$  Hz, 1H), 7.69 (t,  $J = 7.5$  Hz, 2H), 8.32 (d,  $J = 7.5$  Hz, 2H);  $^{13}\text{C}$  NMR (75 MHz,  $\text{CS}_2/\text{DMSO}-d_6$ , all 1C unless indicated)  $\delta$  53.84 ( $\text{OCH}_3$ ), 60.79 ( $sp^3\text{-C}$  of  $\text{C}_{60}$ ), 80.43 ( $sp^3\text{-C}$  of  $\text{C}_{60}$ ), 127.12 (2C, aryl C), 127.83 (aryl C), 129.00 (2C, aryl C), 136.86, 137.45, 138.90, 139.15, 139.38, 139.68, 140.14, 140.30, 141.43, 141.56, 141.65, 141.76, 141.90, 141.91, 142.13, 142.14, 142.18, 142.34, 142.39, 142.53 (3C), 142.60, 142.65, 142.71, 143.17, 143.32, 143.33, 143.38, 143.41, 143.44, 143.49, 143.50 (2C), 143.69, 143.72, 143.90, 144.07, 144.32, 144.80, 144.96 (2C), 145.75, 145.79, 145.92, 145.97, 146.16, 146.21, 146.23, 146.39, 146.43, 146.54, 147.04, 147.68, 148.16, 148.46, 151.80, 153.24, 153.40; FT-IR  $\nu/\text{cm}^{-1}$  (KBr) 2919, 1491, 1429, 1186, 1152, 1096, 1060, 983, 924, 897, 763, 734, 692, 584, 527; UV-vis ( $\text{CHCl}_3$ )  $\lambda_{\text{max}}/\text{nm}$  ( $\log \epsilon$ ) 256 (5.05), 327 (4.52), 438 (3.81), 690 (2.20); HRMS (MALDI-TOF): calcd. for  $\text{C}_{66}\text{H}_5$  [ $\text{M}-\text{CH}_3\text{O}$ ] 797.0391, found 797.0395.

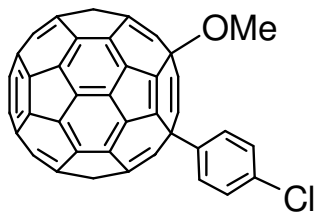

1-(4-Chlorophenyl)-4-methoxy-1,4-dihydro[60]fullerene (**7d**):  $^1\text{H}$  NMR (300 MHz,  $\text{CS}_2/\text{DMSO}-d_6$ )  $\delta$  4.27 (s, 3H), 7.67 (d,  $J = 8.4$  Hz, 2H), 8.31 (d,  $J = 8.4$  Hz, 2H);  $^{13}\text{C}$  NMR (75 MHz,  $\text{CS}_2/\text{DMSO}-d_6$ , all 1C unless indicated)  $\delta$  53.88 ( $\text{OCH}_3$ ), 60.00 ( $sp^3$ -C of  $\text{C}_{60}$ ), 80.37 ( $sp^3$ -C of  $\text{C}_{60}$ ), 128.64 (2C, aryl C), 129.10 (2C, aryl C), 133.90 (aryl C), 136.97, 137.63, 137.78 (aryl C), 138.76, 139.46, 139.92, 140.24, 140.32, 141.41, 141.58, 141.64, 141.77, 141.86, 141.90, 142.18, 142.22 (2C), 142.34, 142.45, 142.47, 142.51, 142.55 (2C), 142.67, 142.74, 143.15, 143.30, 143.32, 143.39 (2C), 143.44 (3C), 143.47, 143.71, 143.72, 143.77, 144.04, 144.41, 144.85, 144.98, 145.00, 145.75, 145.79, 145.92, 145.95, 146.19, 146.25, 146.27, 146.34 (2C), 146.39, 146.96, 147.74, 148.18, 148.23, 151.21, 152.57, 152.75; FT-IR  $\nu/\text{cm}^{-1}$  (KBr) 2920, 1486, 1456, 1428, 1185, 1094, 1060, 1014, 982, 924, 896, 841, 822, 763, 621, 585, 561, 526; UV-vis ( $\text{CHCl}_3$ )  $\lambda_{\text{max}}/\text{nm}$  (log  $\epsilon$ ) 256 (5.09), 327 (4.55), 443 (3.83), 685 (2.48); HRMS (MALDI-TOF): calcd. for  $\text{C}_{66}\text{H}_4\text{Cl}$  [ $\text{M}-\text{CH}_3\text{O}$ ] 831.0002, found 831.0001.

**Arylation of Fullerenols 2a-d in the Presence of *p*-Toluenesulfonic Acid.** Into a 25-mL round-bottomed flask was added fullereneol **2a** (**2b**, **2c** or **2d**, 10.0 mg), *p*-toluenesulfonic acid (5 equiv.), and 20 mL of toluene. The mixture was heated and stirred in an oil bath preset at 80 °C. The reaction was monitored by TLC and stopped at the desired time. After the solvent was evaporated *in vacuo*, the residue was separated on a silica gel column with carbon disulfide as the eluent to afford compound **8a** (**8b**, **8c** or **8d**), then with carbon disulfide/toluene as the eluent to afford unreacted fullereneol **2a** (**2b**, **2c** or **2d**).

The spectral data of compounds **8a-d** are listed below.

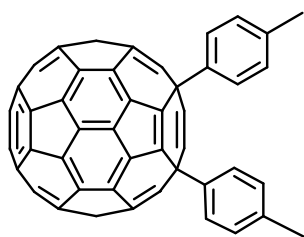

1,4-Bis(4-methylphenyl)-1,4-dihydro[60]fullerene (**8a**):  $^1\text{H}$  NMR (300 MHz,  $\text{CS}_2/\text{DMSO}-d_6$ )  $\delta$  2.61 (s, 6H), 7.42 (d,  $J = 8.1$  Hz, 4H), 8.06 (d,  $J = 8.1$  Hz, 4H);  $^{13}\text{C}$  NMR (75 MHz,  $\text{CS}_2/\text{DMSO}-d_6$  with  $\text{Cr}(\text{acac})_3$  as relaxation reagent, all 2C unless indicated)  $\delta$  20.28 ( $\text{CH}_3$ ), 60.00 ( $sp^3$ -C of  $\text{C}_{60}$ ), 126.13 (4C, aryl C), 128.82 (4C, aryl C), 135.88, 135.94, 136.38, 137.37, 139.54 (aryl C), 140.63 (1C), 140.83, 141.12, 141.18, 141.29 (1C), 141.56 (1C), 141.67, 141.70, 141.75, 142.45, 142.52, 142.56, 142.77, 142.88, 142.91, 143.31, 143.46 (1C), 143.60, 143.74, 144.08, 145.36, 145.48,

145.52, 145.65, 147.06, 147.17, 149.63, 155.42; FT-IR  $\nu/\text{cm}^{-1}$  (KBr) 2921, 1507, 1428, 1186, 1120, 1020, 810, 772, 761, 587, 563, 527; UV-vis ( $\text{CHCl}_3$ )  $\lambda_{\text{max}}/\text{nm}$  ( $\log \epsilon$ ) 261 (5.08), 328 (4.55), 444 (3.84), 686 (2.54); HRMS (MALDI-TOF): calcd. for  $\text{C}_{74}\text{H}_{14}$  [M] 902.1096, found 902.1071.

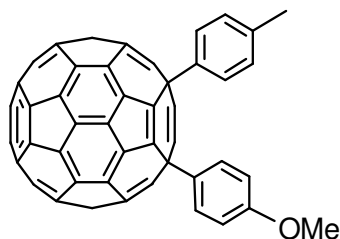

1-(4-Methoxyphenyl)-4-(4-methylphenyl)-1,4-dihydro[60]fullerene (**8b**):  $^1\text{H}$  NMR (300 MHz,  $\text{CS}_2/\text{DMSO}-d_6$ )  $\delta$  2.61 (s, 3H), 4.00 (s, 3H), 7.11 (d,  $J = 8.7$  Hz, 2H), 7.42 (d,  $J = 7.8$  Hz, 2H), 8.04-8.08 (m, 4H);  $^{13}\text{C}$  NMR (75 MHz,  $\text{CS}_2/\text{DMSO}-d_6$  with  $\text{Cr}(\text{acac})_3$  as relaxation reagent, all 1C unless indicated)  $\delta$  20.48 ( $\text{CH}_3$ ), 54.14 ( $\text{OCH}_3$ ), 59.90 ( $sp^3\text{-C}$  of  $\text{C}_{60}$ ), 60.25 ( $sp^3\text{-C}$  of  $\text{C}_{60}$ ), 113.74 (2C, aryl C), 126.38 (2C, aryl C), 127.53 (2C, aryl C), 129.06 (2C, aryl C), 131.05 (aryl C), 136.06, 136.17, 136.22, 136.66, 137.61 (2C), 139.79, 140.89, 141.10, 141.11, 141.41 (2C), 141.44 (2C), 141.56, 141.93, 141.94, 141.97 (2C), 142.01 (2C), 142.71, 142.74, 142.77, 142.80, 142.82 (2C), 143.03, 143.05, 143.15 (2C), 143.18 (4C), 143.57 (2C), 143.71, 143.85, 143.87, 143.96, 144.07, 144.35 (2C), 145.63 (2C), 145.69, 145.76, 145.79 (2C), 145.90, 145.91, 147.27, 147.34, 147.44 (2C), 149.89, 150.03, 155.66, 155.74, 158.35 (aryl C); FT-IR  $\nu/\text{cm}^{-1}$  (KBr) 2922, 1604, 1506, 1458, 1431, 1300, 1251, 1179, 1035, 824, 765, 584, 527; UV-vis ( $\text{CHCl}_3$ )  $\lambda_{\text{max}}/\text{nm}$  ( $\log \epsilon$ ) 258 (4.99), 328 (4.46), 444 (3.75), 680 (2.41); HRMS (MALDI-TOF): calcd. for  $\text{C}_{74}\text{H}_{14}\text{O}$  [M] 918.1045, found 918.1039.

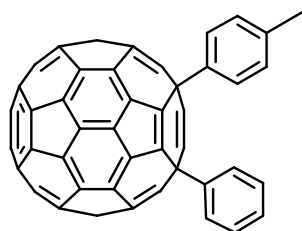

1-(4-Methylphenyl)-4-phenyl-1,4-dihydro[60]fullerene (**8c**):  $^1\text{H}$  NMR (300 MHz,  $\text{CS}_2/\text{DMSO}-d_6$ )  $\delta$  2.55 (s, 3H), 7.36 (t,  $J = 8.1$  Hz, 2H), 7.51-7.60 (m, 3H), 8.00 (t,  $J = 8.1$  Hz, 2H), 8.14 (t,  $J = 8.1$  Hz, 2H);  $^{13}\text{C}$  NMR (75 MHz,  $\text{CS}_2/\text{DMSO}-d_6$  with  $\text{Cr}(\text{acac})_3$  as relaxation reagent, all 1C unless indicated)  $\delta$  20.48 ( $\text{CH}_3$ ), 60.33 ( $sp^3\text{-C}$  of  $\text{C}_{60}$ ), 60.51 ( $sp^3\text{-C}$  of  $\text{C}_{60}$ ), 126.39 (2C, aryl C), 126.46 (2C, aryl C), 127.30 (aryl C), 128.41 (2C, aryl C), 129.07 (2C, aryl C), 136.20 (2C), 136.30, 136.71, 137.65, 137.74, 139.11, 139.90, 140.96, 141.15 (2C), 141.42 (2C), 141.50 (2C), 141.62, 141.88 (2C), 142.02, 142.04, 142.07 (2C), 142.73, 142.78, 142.84, 142.88 (3C), 143.08, 143.11, 143.16, 143.18, 143.23 (2C), 143.24, 143.25, 143.62 (2C), 143.78, 143.83, 143.93, 143.97, 144.21, 144.42 (2C), 145.70 (2C), 145.78 (2C), 145.84 (2C), 145.98 (2C), 147.33, 147.37, 147.50, 147.51, 149.75, 149.97, 155.50, 155.69; FT-IR  $\nu/\text{cm}^{-1}$  (KBr)



2919, 1596, 1490, 1427, 1266, 1229, 1186, 1029, 897, 759, 733, 691, 583, 558, 526; UV-vis (CHCl<sub>3</sub>)  $\lambda_{\text{max}}$ /nm (log  $\epsilon$ ) 259 (4.97), 329 (4.51), 444 (3.79), 678 (2.52); HRMS (MALDI-TOF): calcd. for C<sub>73</sub>H<sub>12</sub> [M] 888.0939, found 888.0934.

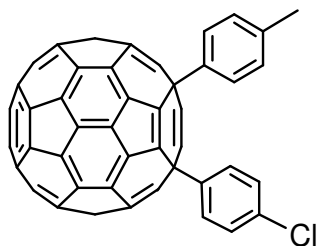

1-(4-Chlorophenyl)-4-(4-methylphenyl)-1,4-dihydro[60]fullerene (**8d**): <sup>1</sup>H NMR (300 MHz, CS<sub>2</sub>/CDCl<sub>3</sub>)  $\delta$  2.51 (s, 3H), 7.36 (d,  $J$  = 8.1 Hz, 2H), 7.50 (d,  $J$  = 8.4 Hz, 2H), 7.99 (d,  $J$  = 8.1 Hz, 2H), 8.07 (d,  $J$  = 8.4 Hz, 2H); <sup>13</sup>C NMR (75 MHz, CS<sub>2</sub>/DMSO-*d*<sub>6</sub> with Cr(acac)<sub>3</sub> as relaxation reagent, all 1C unless indicated)  $\delta$  20.40 (CH<sub>3</sub>), 59.58 (*sp*<sup>3</sup>-C of C<sub>60</sub>), 60.16 (*sp*<sup>3</sup>-C of C<sub>60</sub>), 126.17 (2C, aryl C), 127.81 (2C, aryl C), 128.41 (2C, aryl C), 129.09 (2C, aryl C), 133.28 (aryl C), 135.86, 135.98, 136.26, 136.81, 137.35, 137.57, 137.73, 139.83, 140.78, 140.98, 141.03, 141.22, 141.26, 141.36 (2C), 141.49, 141.72 (3C), 141.87, 141.91 (1C), 141.93, 142.46, 142.66, 142.70 (3C), 142.80, 142.88 (3C), 142.98, 143.04, 143.06, 143.09, 143.13, 143.44 (3C), 143.56, 143.77, 143.88, 144.30 (2C), 144.34, 145.50, 145.56 (2C), 145.57, 145.68, 145.71, 145.84, 145.86, 147.01, 147.13, 147.35, 147.41, 149.11, 149.78, 154.64, 155.47; FT-IR  $\nu$ /cm<sup>-1</sup> (KBr) 2918, 1507, 1486, 1458, 1428, 1400, 1267, 1228, 1185, 1094, 1014, 896, 837, 817, 763, 621, 584, 559, 527; UV-vis (CHCl<sub>3</sub>)  $\lambda_{\text{max}}$ /nm (log  $\epsilon$ ) 258 (4.97), 327 (4.51), 444 (3.76), 677 (2.40); HRMS (MALDI-TOF): calcd. for C<sub>73</sub>H<sub>11</sub>Cl [M] 922.0549, found 922.0554.

#### References:

1. Chen, Z.-X.; Wang, G.-W. *J. Org. Chem.* **2005**, *70*, 2380.

<sup>1</sup>H NMR (300 MHz, CS<sub>2</sub>/CDCl<sub>3</sub>) of compound **2a**

8.159  
8.133  
7.413  
7.386  
7.231

3.774

2.499

1.261

0.003

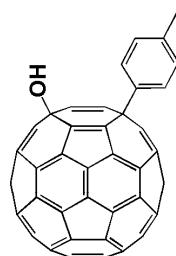

**2a**

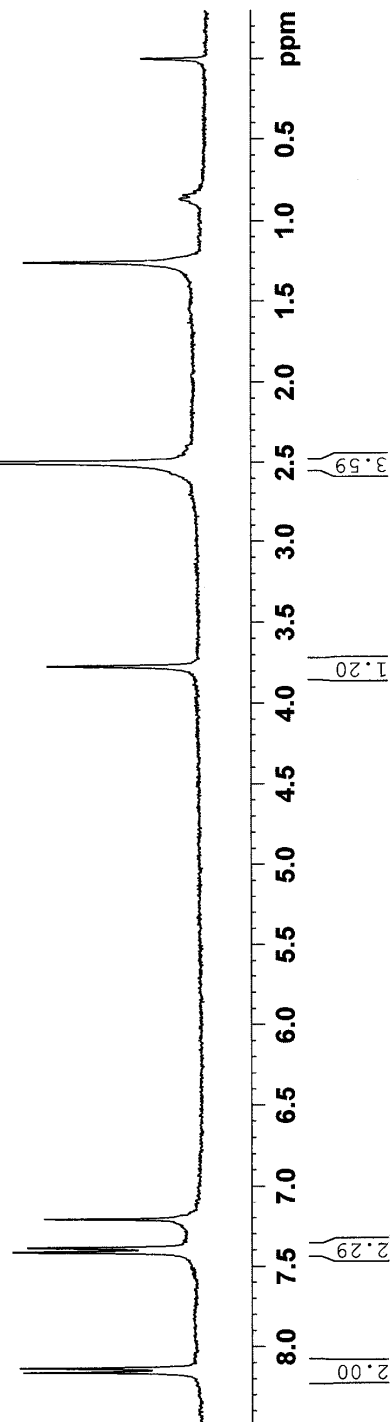

Current Data Parameters  
NAME lym07122702  
EXPNO 1  
PROCNO 1  
F2 - Acquisition Parameters  
Date\_ 20071227  
Time 10.37  
INSTRUM av300  
PROBHD 5 mm BBO BB-1H  
PULPROG zg  
TD 32768  
SOLVENT CDCl3  
NS 48  
DS 1  
SWH 8992.806 Hz  
FIDRES 0.274439 Hz  
AQ 1.8219508 sec  
RG 456.1  
DA 55.600 usec  
DE 6.00 usec  
TE 300.0 K  
DI 2.00000000 sec  
MCREST 0.00000000 sec  
MCWRK 0.01500000 sec  
===== CHANNEL f1 =====  
NUC1 1H  
P1 7.50 usec  
PL1 -3.00 dB  
SFO1 300.1321009 MHz  
F2 - Processing parameters  
SI 16384  
SF 300.1300219 MHz  
WDW EM  
SSB 0  
LB 0.30 Hz  
GB 0  
PC 1.00

Current Data Parameters  
 NAME lym070705  
 EXPNC 4  
 PROCNO 1

F2 - Acquisition Parameters  
 Date\_ 20070705  
 Time 6:53  
 INSTRUM av300  
 PROBHD 5 mm BBO BB-1H  
 PULPROG zgpg  
 TD 32768  
 SOLVENT DMSO  
 NS 17408  
 DS 4  
 SWH 22675.736 Hz  
 FIDRES 0.692009 Hz  
 AQ 0.7225844 sec  
 RG 8192  
 CW 22.050 usec  
 DE 6.00 usec  
 TE 302.6 K  
 D1 2.00000000 sec  
 d11 0.03000000 sec  
 MCREST 0.00000000 sec  
 MCWPK 0.01500000 sec

===== CHANNEL f1 =====  
 NUC1 13C  
 P1 3.00 usec  
 PL1 -1.00 dB  
 SF01 75.4768051 MHz

===== CHANNEL f2 =====  
 CPOPRG2 waltz16  
 NUC2 1H  
 PCPD2 80.00 usec  
 PL2 -3.00 dB  
 PL12 16.00 dB  
 SF02 300.1315007 MHz

F2 - Processing parameters  
 SI 131072  
 SF 75.4678556 MHz  
 WDW EM  
 SSB 0  
 LB 0.50 Hz  
 GB 0  
 PC 1.40

1D NMR plot parameters  
 CX 22.00 cm  
 CY 0.00 cm  
 F1P 200.045 ppm  
 F1 15096.99 Hz  
 F2P -15.063 ppm  
 F2 -1136.78 Hz  
 PPMCM 9.77765 ppm/cm  
 HZCM 737.89850 Hz/cm

**<sup>13</sup>C NMR (75 MHz, CS<sub>2</sub>/DMSO-d<sub>6</sub>) of compound 2a**

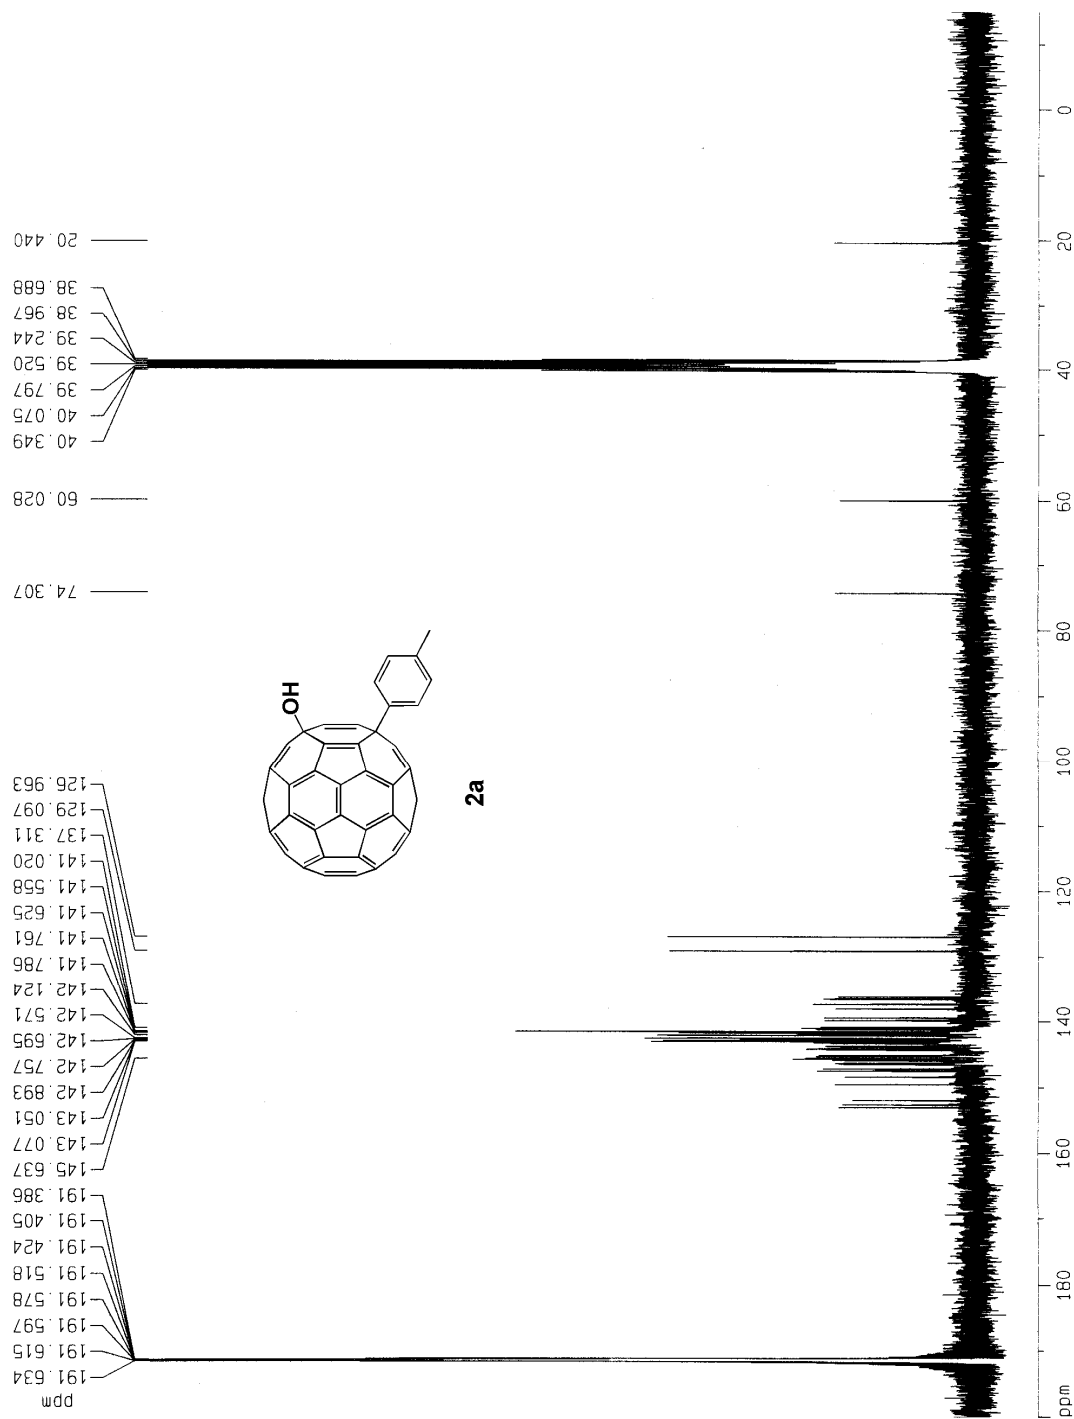

<sup>1</sup>H NMR (300 MHz, CS<sub>2</sub>/CDCl<sub>3</sub>) of compound 2b

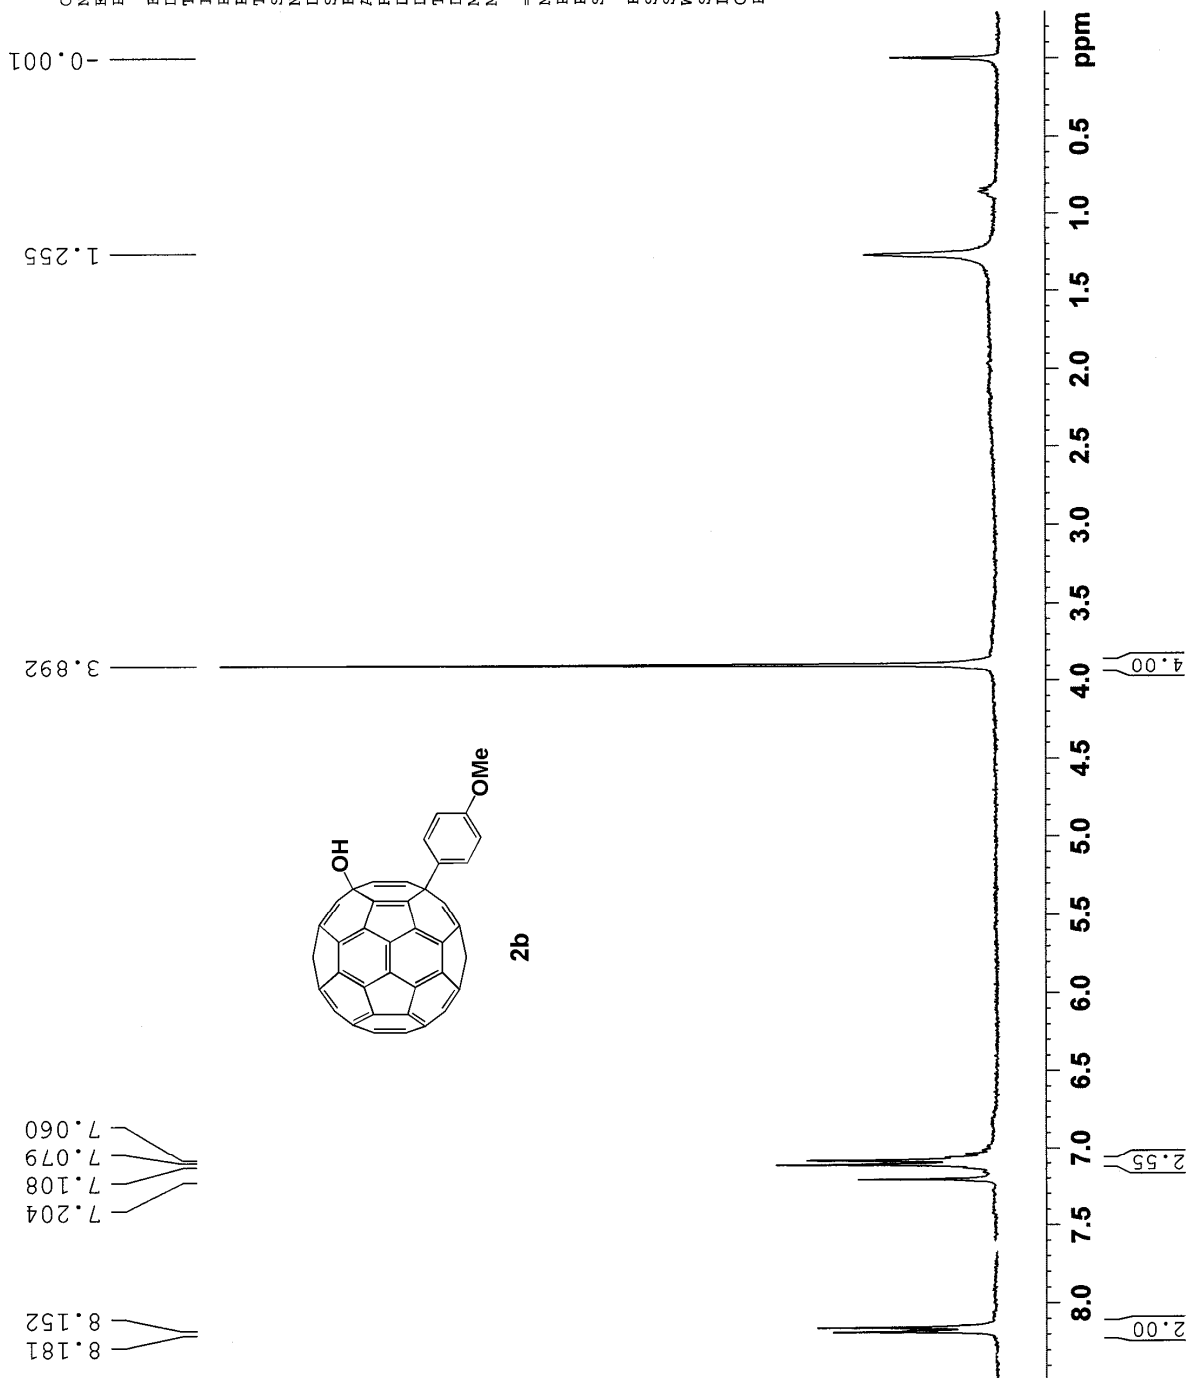

Current Data Parameters  
 NAME lym07122701  
 EXPNO 1  
 PROCNO 1  
 F2 - Acquisition Parameters  
 Date\_ 20071227  
 Time 10.30  
 INSTRUM av300  
 PROBD 5 mm BBO BB-1H  
 PULPROG zg  
 TD 32768  
 SOLVENT CDCl3  
 NS 32  
 DS 1  
 SWH 8992.806 Hz  
 FIDRES 0.274439 Hz  
 AQ 1.8219508 sec  
 RG 456.1  
 DW 55.600 usec  
 DE 6.00 usec  
 TE 300.0 K  
 D1 2.0000000 sec  
 MCREST 0.0000000 sec  
 MCWRR 0.0150000 sec  
 ===== CHANNEL f1 =====  
 NUC1 1H  
 P1 7.50 usec  
 PL1 -3.00 dB  
 SFO1 300.1321009 MHz  
 F2 - Processing parameters  
 SI 16384  
 SF 300.1300238 MHz  
 WDW EM  
 SSB 0  
 LB 0.30 Hz  
 GB 0  
 PC 1.00

**<sup>13</sup>C NMR (75 MHz, CS<sub>2</sub>/DMSO-d<sub>6</sub>) of compound 2b**

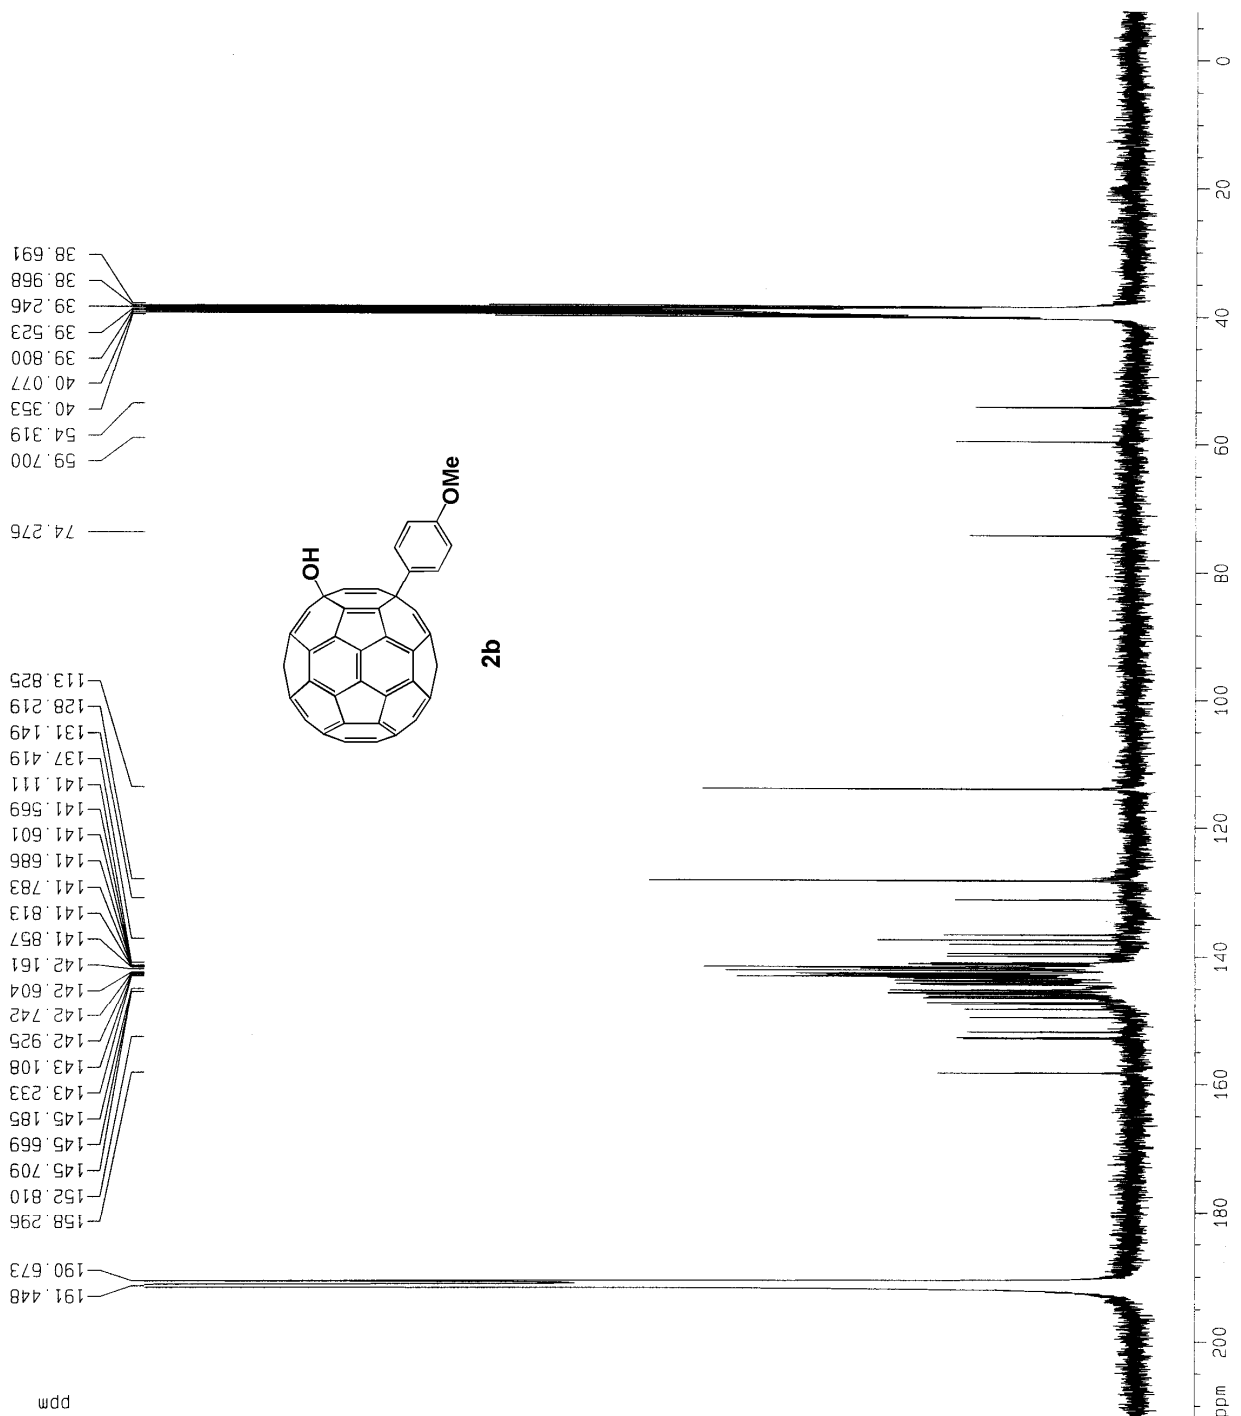

Current Data Parameters  
NAME czx031223c  
EXPNO 2  
PROCNO 1

F2 - Acquisition Parameters  
Date\_ 20031224  
Time 8.16  
INSTRUM av300  
PROBHD 5 mm BBO BB-H  
PULPROG zgpg  
TD 32768  
SOLVENT DMSO  
NS 17302  
DS 2  
SMH 16556.291 Hz  
FIDRES 0.505258 Hz  
AQ 0.9896436 sec  
RG 5792.6  
DM 30.200 usec  
DE 6.00 usec  
TE 300.0 K  
D1 2.00000000 sec  
d11 0.03000000 sec  
MCREST 0.00000000 sec  
MCWIRK 0.01500000 sec

===== CHANNEL f1 =====  
NUC1 13C  
P1 5.30 usec  
PL1 -6.00 dB  
SF01 75.4755588 MHz

===== CHANNEL f2 =====  
CPDPRG2 waltz16  
NUC2 1H  
PCPD2 80.00 usec  
PL2 -3.00 dB  
PL12 15.00 dB  
SF02 300.1315007 MHz

F2 - Processing parameters  
SI 131072  
SF 75.4678527 MHz  
WDW EM  
SSB 0  
LB 1.00 Hz  
GB 0  
PC 1.40

1D NMR plot parameters  
CX 22.00 cm  
CY 3000.00 cm  
F1P 211.803 ppm  
F1 15984.29 Hz  
F2P -7.579 ppm  
F2 -972.00 Hz  
PPMCM 9.97191 ppm/cm  
HZCM 752.55872 Hz/cm

<sup>1</sup>H NMR (300 MHz, CS<sub>2</sub>/CDCl<sub>3</sub>) of compound 2c

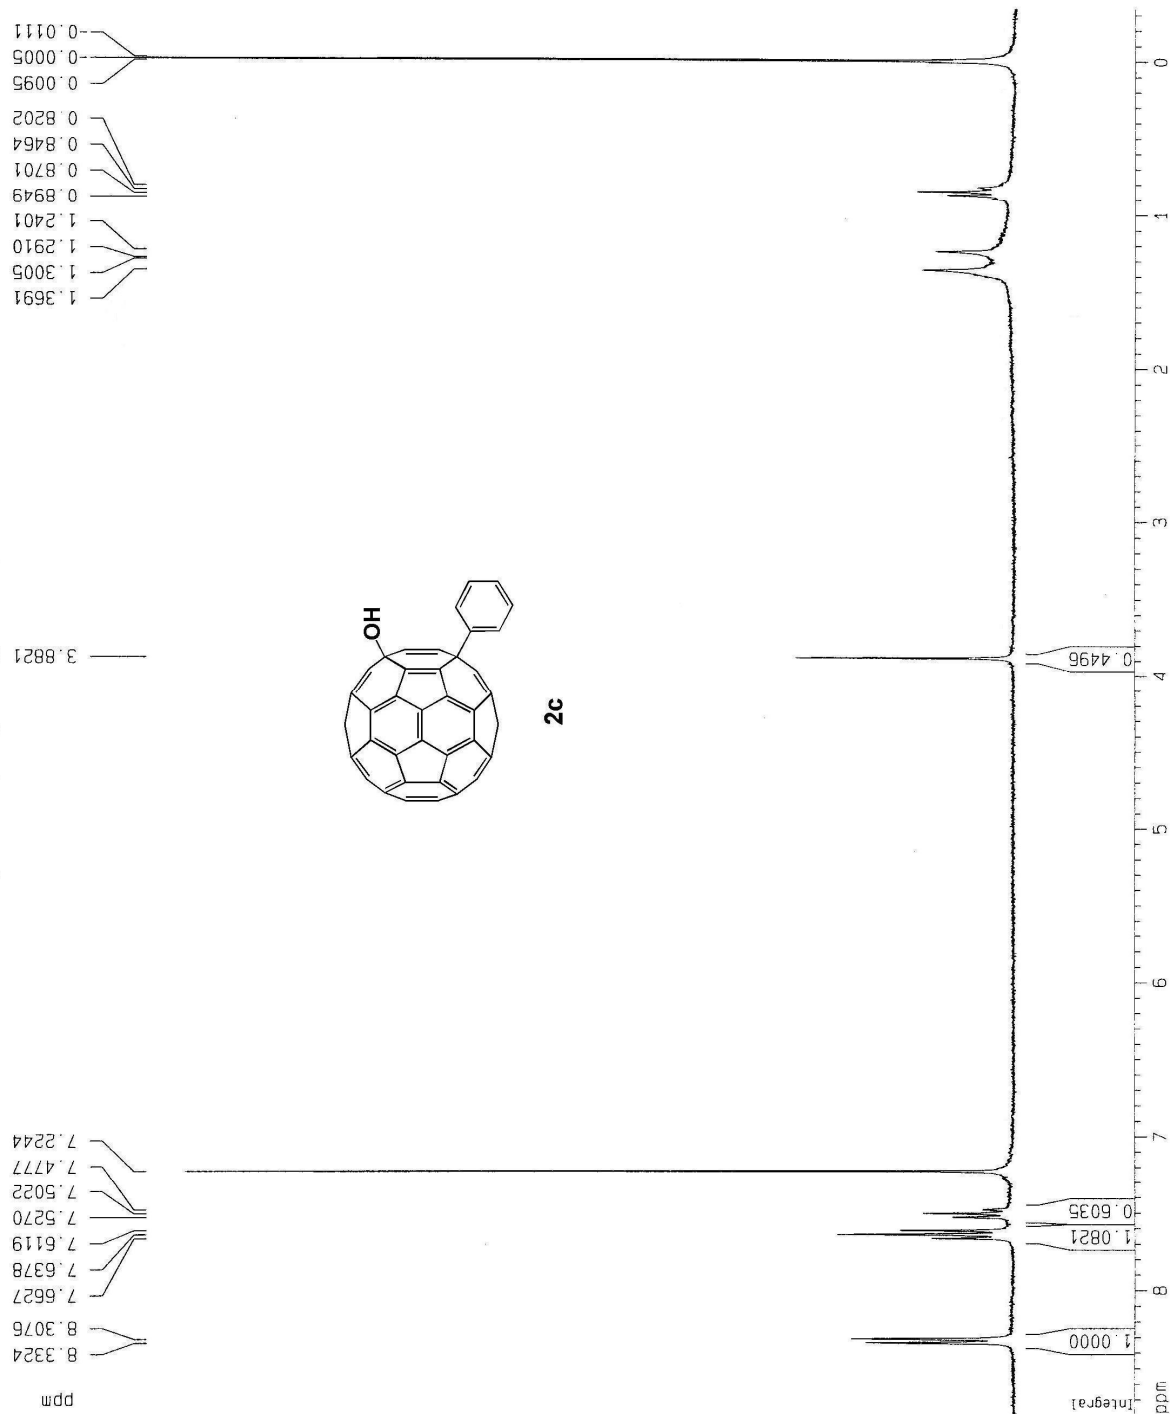

Current Data Parameters  
 NAME: czx031203-1  
 EXPNO: 1  
 PROCNO: 1

F2 - Acquisition Parameters  
 Date\_: 20031203  
 Time: 9.59  
 INSTRUM: av300  
 PULPROG: 5 mm BB0 BB-1H  
 TD: 32768  
 SOLVENT: CDCl3  
 NS: 200  
 DS: 2  
 SWH: 5995.204 Hz  
 FIDRES: 0.182959 Hz  
 AQ: 2.7329011 sec  
 RG: 362  
 DW: 83.400 usec  
 DE: 6.00 usec  
 TE: 300.0 K  
 D1: 2.00000000 sec  
 MCREST: 0.00000000 sec  
 MCNWK: 0.01500000 sec

===== CHANNEL f1 =====  
 NUC1: 1H  
 P1: 7.50 usec  
 PL1: -3.00 dB  
 SF01: 300.1321009 MHz

F2 - Processing parameters  
 SI: 16384  
 SF: 300.1300170 MHz  
 WDW: no  
 SSB: 0  
 LB: 0.00 Hz  
 GB: 0  
 PC: 1.00

1D NMR plot parameters  
 CX: 22.00 cm  
 CY: 0.00 cm  
 F1P: 8.791 ppm  
 F1: 2638.35 Hz  
 F2P: -0.341 ppm  
 F2: -102.32 Hz  
 PPMCM: 0.41507 ppm/cm  
 HZCM: 124.57565 Hz/cm



<sup>13</sup>C NMR (75 MHz, CS<sub>2</sub>/DMSO-d<sub>6</sub>) of compound 2c

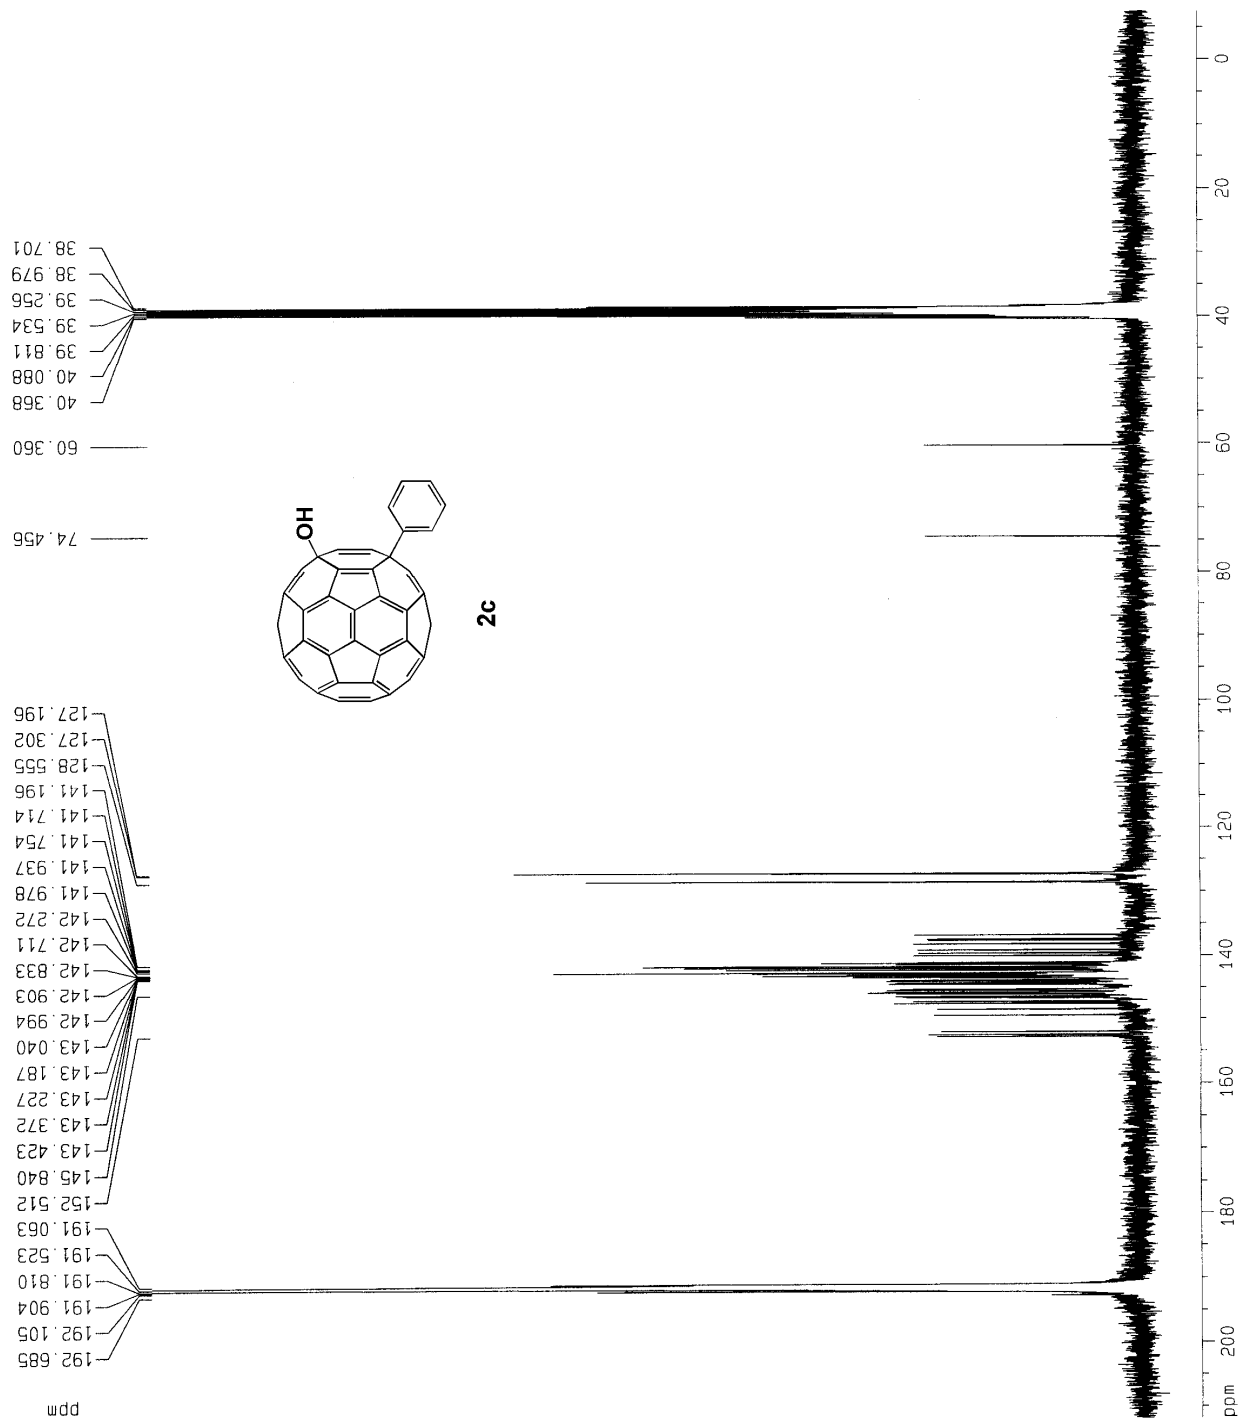

Current Data Parameters  
NAME czx031127  
EXPNO 2  
PROCNO 1

F2 - Acquisition Parameters  
Date\_ 20031127  
Time 17.46  
INSTRUM av300  
PROBHD 5 mm BBO BB-1H  
PULPROG zgpg30  
TD 32768  
SOLVENT DMSO  
NS 17013  
DS 2  
SWH 16556.291 Hz  
FIDRES 0.505258 Hz  
AQ 0.9896436 sec  
RG 3649.1  
DM 30.200 usec  
DE 6.00 usec  
TE 300.1 K  
D1 2.00000000 sec  
d11 0.03000000 sec  
wCRET 0.00000000 sec  
wCMRK 0.01500000 sec

===== CHANNEL f1 =====  
NUC1 <sup>13</sup>C  
P1 2.40 usec  
PL1 -6.00 dB  
SF01 75.4755568 MHz

===== CHANNEL f2 =====  
CPDPRG2 waltz16  
NUC2 <sup>1</sup>H  
PCPD2 80.00 usec  
PL2 120.00 dB  
PL12 16.00 dB  
SF02 300.1315007 MHz

F2 - Processing parameters  
SI 131072  
SF 75.4678444 MHz  
WDW EM  
SSB 0  
LB 1.00 Hz  
GB 0  
PC 1.40

1D NMR plot parameters  
CX 22.00 cm  
CY 0.00 cm  
F1P 211.913 ppm  
F1 15982.63 Hz  
F2P -7.469 ppm  
F2 -563.66 Hz  
wPM 9.97191 ppm/cm  
wZCM 752.55865 Hz/cm



<sup>1</sup>H NMR (300 MHz, CS<sub>2</sub>/CDCl<sub>3</sub>) of compound 2d

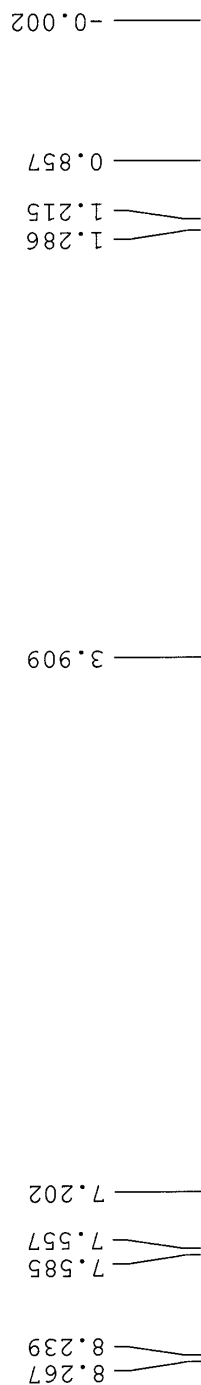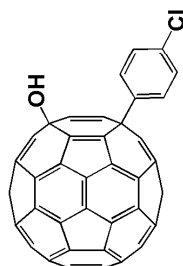

2d

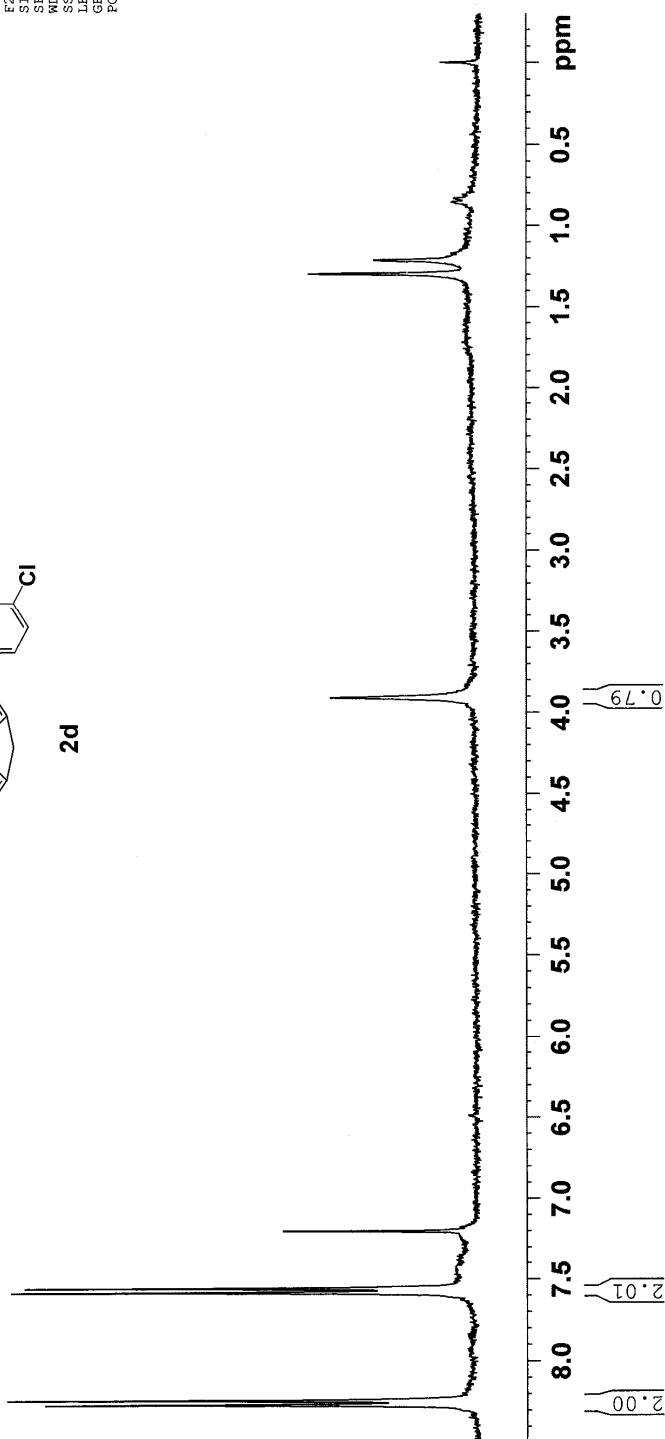

Current Data Parameters  
 NAME lym07122703  
 EXPNO 1  
 PROCNO 1  
 F2 - Acquisition Parameters  
 Date\_ 20071227  
 Time\_ 10.19  
 INSTRUM av300  
 PROBHD 5 mm BBO BB-1H  
 PULPROG zg  
 TD 32768  
 SOLVENT CDCl3  
 NS 16  
 DS 1  
 SWH 8992.842 Hz  
 FIDRES 0.224499 Hz  
 AQ 1.821958 sec  
 RG 362  
 DW 55.600 usec  
 DE 6.00 usec  
 TE 300.0 K  
 D1 2.00000000 sec  
 MCREST 0.00000000 sec  
 MCWRR 0.01500000 sec  
 CHANNEL f1  
 NUC1 1H  
 P1 7.50 usec  
 PL1 -3.00 dB  
 SF01 300.1321009 MHz  
 F2 - Processing parameters  
 SI 16384  
 SF 300.1300245 MHz  
 WDW EM  
 SSB 0  
 LB 0.30 Hz  
 GB 0  
 PC 1.00

<sup>13</sup>C NMR (75 MHz, CS<sub>2</sub>/DMSO-d<sub>6</sub>) of compound 2d

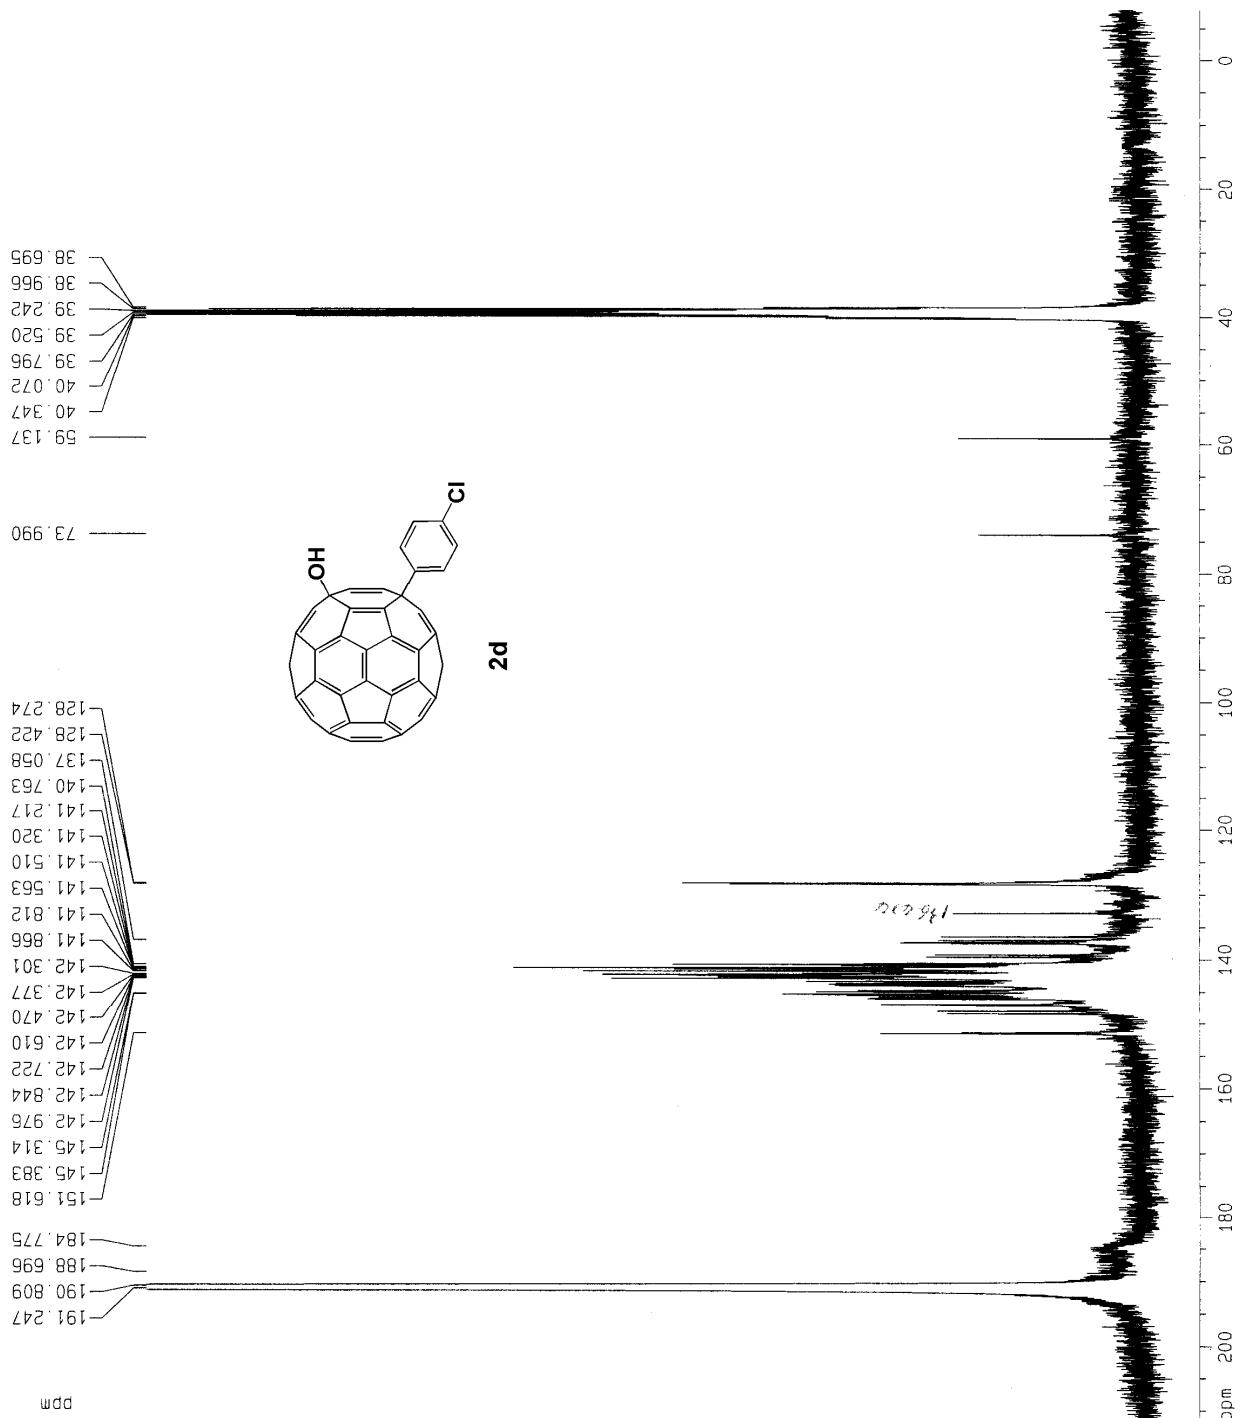

Current Data Parameters  
NAME czx0408c  
EXPNO 2  
PROCNO 1

F2 - Acquisition Parameters  
Date\_ 20040409  
Time 7.58  
INSTRUM av300  
PROBHD 5 mm BBO BB-1H  
PULPROG zgpg30  
TD 32768  
SOLVENT DMSO  
NS 17777  
DS 2  
SWH 16556.291 Hz  
FIDRES 0.505258 Hz  
AQ 0.9896436 sec  
RG 4096  
DM 30.200 usec  
DE 6.00 usec  
TE 300.0 K  
D1 2.00000000 sec  
d11 0.03000000 sec  
MCREST 0.00000000 sec  
MCMRK 0.01500000 sec

===== CHANNEL f1 =====  
NUC1 13C  
P1 2.40 usec  
PL1 -6.00 dB  
SF01 75.4755588 MHz

===== CHANNEL f2 =====  
CPDPRG2 waltz16  
NUC2 1H  
PCPD2 80.00 usec  
PL2 120.00 dB  
PL12 15.00 dB  
SF02 300.1315007 MHz

F2 - Processing parameters  
SI 131072  
SF 75.4678762 MHz  
WDW EM  
SSB 0  
LB 1.00 Hz  
GB 0  
PC 1.40

1D NMR plot parameters  
CX 22.00 cm  
CY 0.00 cm  
FIP 211.491 ppm  
F1 15960.80 Hz  
F2 -7.891 ppm  
F2 -595.49 Hz  
PPMCM 9.97151 ppm/cm  
HZCM 752.55872 Hz/cm

<sup>1</sup>H NMR (300 MHz, CS<sub>2</sub>/CDCl<sub>3</sub>) of compound 3a

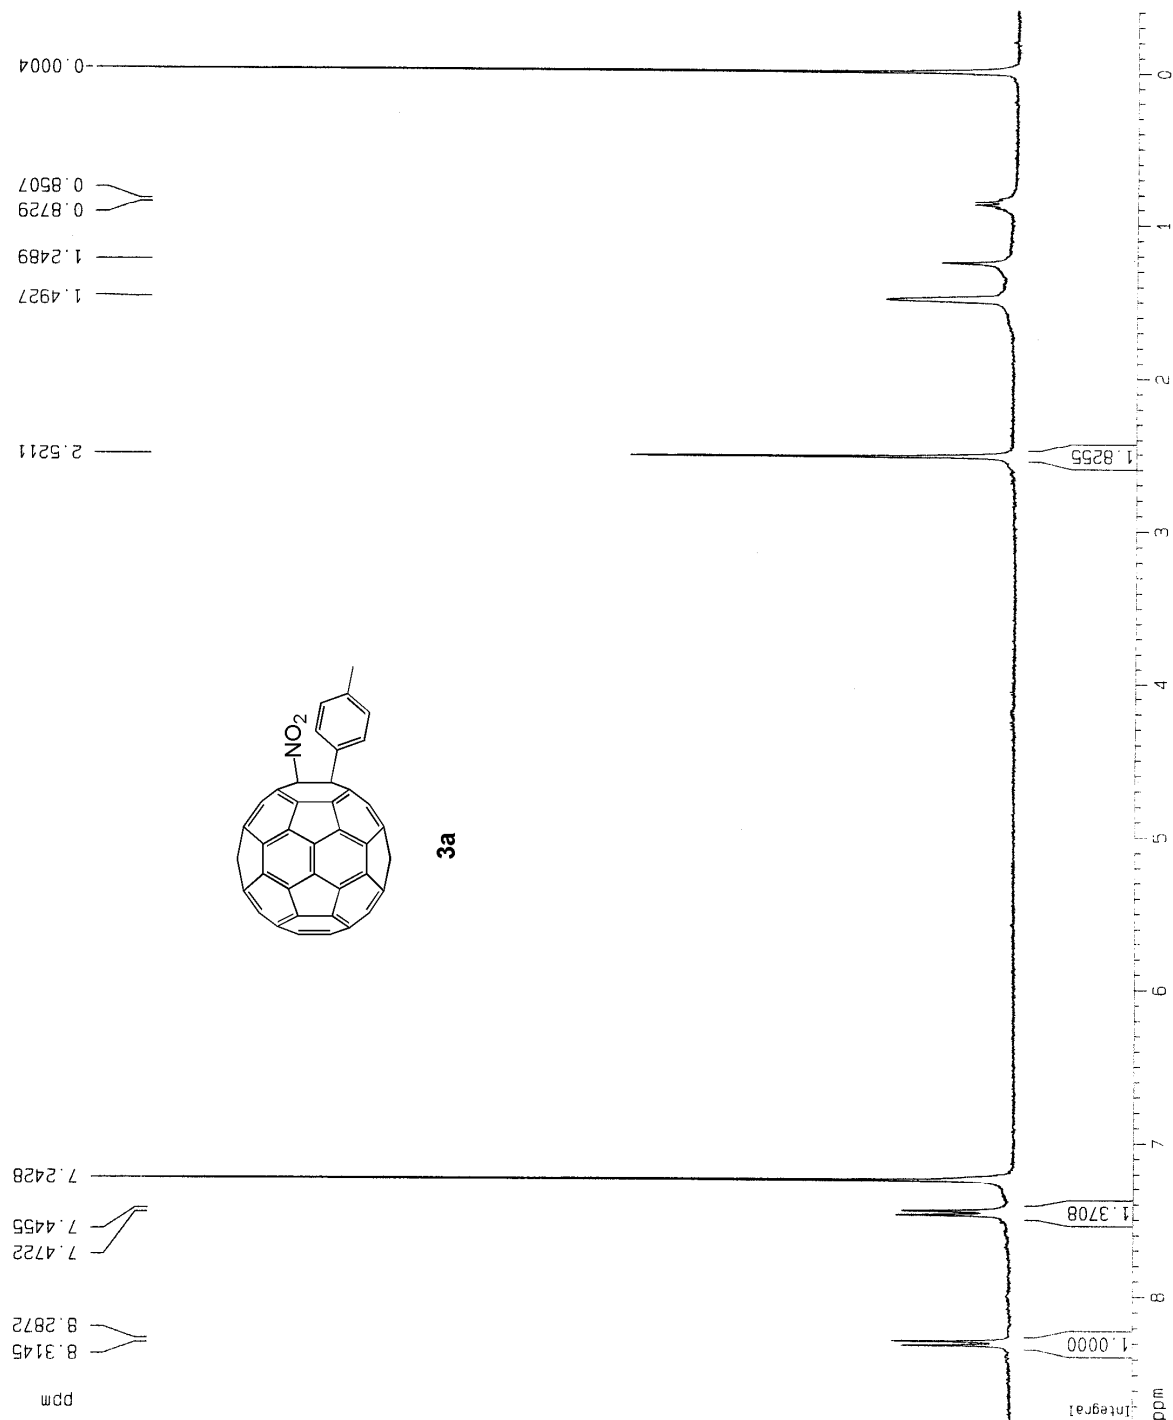

Current Data Parameters  
 NAME lym051201  
 EXPNO 1  
 PROCNO 1

F2 - Acquisition Parameters  
 Date\_ 20051202  
 Time 8.48  
 INSTRUM av300  
 PROBHD 5 mm BBO BB-1H  
 PULPROG zg  
 TD 65536  
 SOLVENT CDCl3  
 NS 80  
 DS 2  
 SWH 5995.204 Hz  
 FIDRES 0.091480 Hz  
 AQ 5.4657526 sec  
 RG 322.5  
 DW 83.400 usec  
 DE 6.00 usec  
 TE 300.0 K  
 D1 2.00000000 sec  
 MCREST 0.00000000 sec  
 MCWRK 0.01500000 sec

===== CHANNEL f1 =====  
 NUC1 1H  
 P1 7.50 usec  
 PL1 -3.00 dB  
 SF01 300.1321009 MHz

F2 - Processing parameters  
 SI 16384  
 SF 300.1300115 MHz  
 WDW no  
 SSB 0  
 LB 0.00 Hz  
 GB 0  
 PC 1.00

1D NMR plot parameters  
 CX 22.00 cm  
 CY 0.00 cm  
 FIP 8.791 ppm  
 F1 2638.53 Hz  
 F2p -0.407 ppm  
 F2 -122.28 Hz  
 PPMCM 0.41812 ppm/cm  
 HZCM 125.45166 Hz/cm

**<sup>13</sup>C NMR (75 MHz, CS<sub>2</sub>/CDCl<sub>3</sub>) of compound 3a**

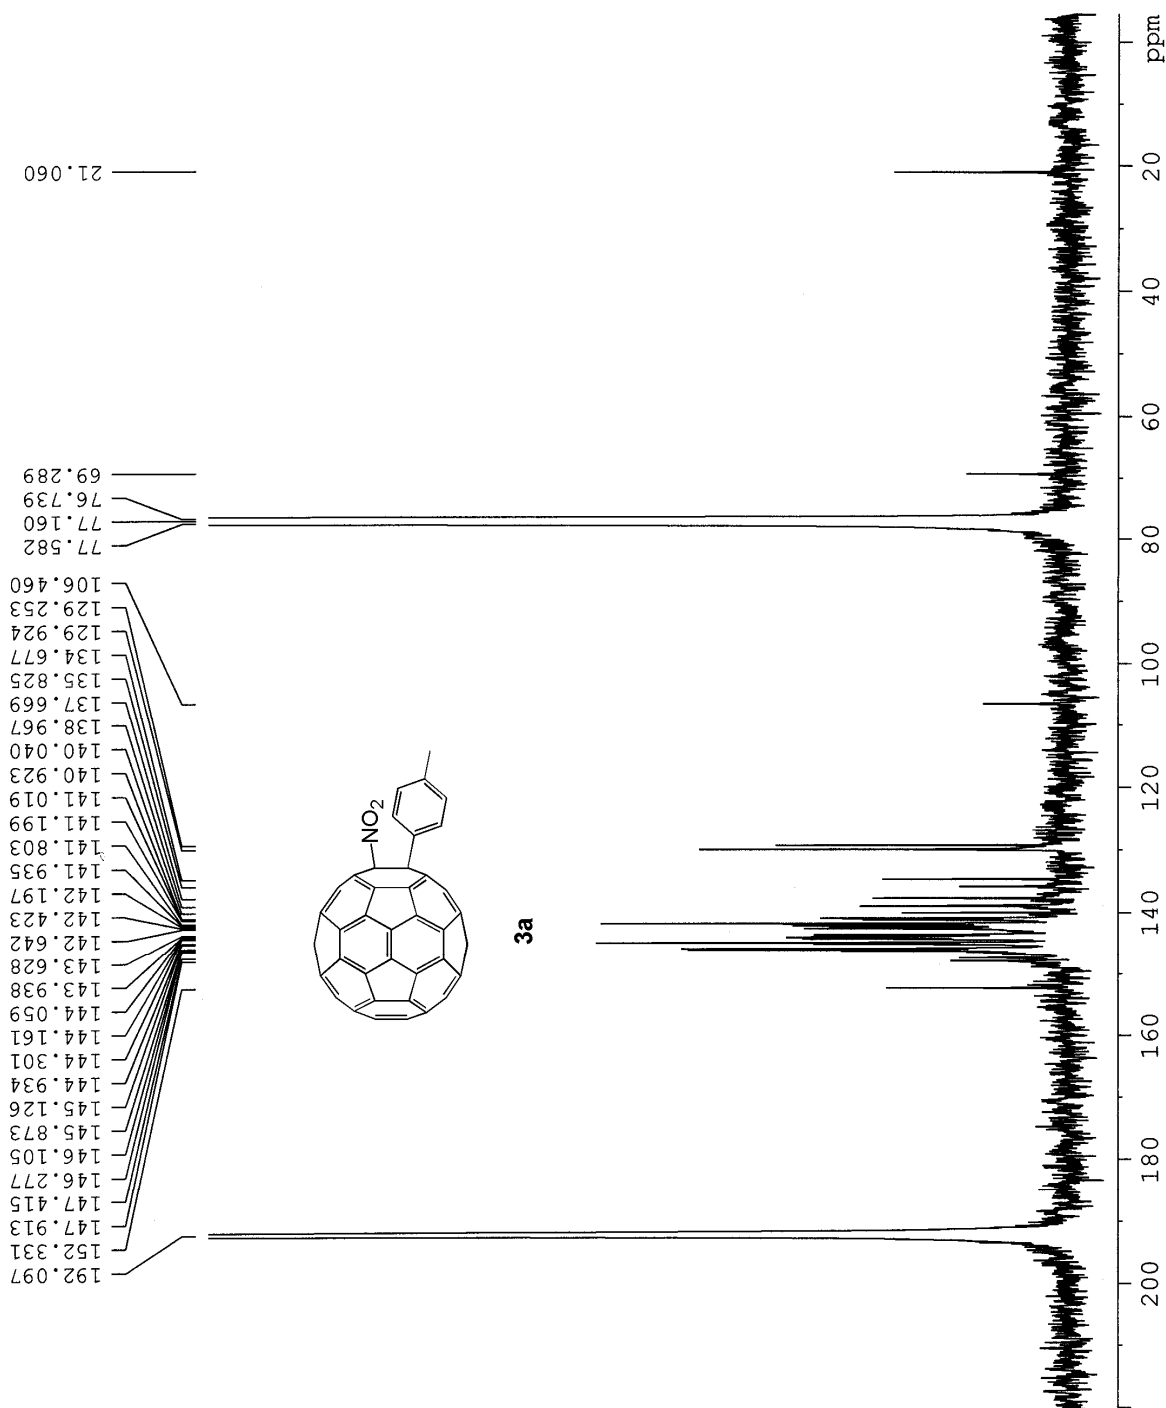

<sup>1</sup>H NMR (300 MHz, CS<sub>2</sub>/DMSO-*d*<sub>6</sub>) of compound **7a**

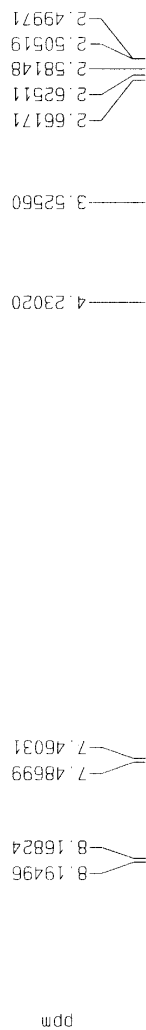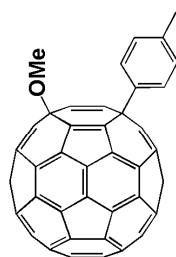

**7a**

Current Data Parameters  
NAME 1ym060707  
EXPNO 1  
PROCNO 1

F2 - Acquisition Parameters  
Date\_ 20060707  
Time 9.26  
INSTRUM av300  
PROBHD 5 mm BBO BB-1H  
PULPROG zg  
TD 65536  
SOLVENT DMSO  
NS 64  
DS 1  
SWH 5995.204 Hz  
FIDRES 0.091480 Hz  
AQ 5.4657526 sec  
RG 512  
CW 83.400 usec  
DE 6.00 usec  
TE 300.0 K  
D1 2.00000000 sec  
MCREST 0.00000000 sec  
MCWK 0.01500000 sec

===== CHANNEL f1 =====  
NUC1 1H  
P1 7.50 usec  
PL1 -3.00 dB  
SF01 300.1321009 MHz

F2 - Processing parameters  
SI 15384  
SF 300.1300029 MHz  
WDW no  
SSB 0  
LB 0.00 Hz  
GB 0  
PC 1.00

1D NMR plot parameters  
CX 22.00 cm  
CY 0.00 cm  
F1P 9.422 ppm  
F1 2827.94 Hz  
F2P -0.565 ppm  
F2 -169.66 Hz  
PPMCM 0.45399 ppm/cm  
HZCM 136.25462 Hz/cm

Current Data Parameters  
 NAME lym070312  
 EXPNO 4  
 PROCNO 1

F2 - Acquisition Parameters

Date\_ 20070313  
 Time 7:54  
 INSTRUM av300  
 PROBD 5 mm BBO BB-1H  
 PULPROG zgpg  
 TD 65536  
 SOLVENT DMSO  
 NS 14633  
 DS 4  
 SWH 22675.736 Hz  
 FIDRES 0.346004 Hz  
 AQ 1.4451188 sec  
 RG 3649.1  
 DW 22.050 usec  
 DE 6.00 usec  
 TE 300.0 K  
 D1 2.00000000 sec  
 d11 0.03000000 sec  
 MCREST 0.00000000 sec  
 MCWRRK 0.01500000 sec

===== CHANNEL f1 =====

NUC1 13C  
 P1 3.00 usec  
 PL1 -1.00 dB  
 SF01 75.4768051 MHz

===== CHANNEL f2 =====

CPDPRG2 waitz16  
 NUC2 1H  
 PCPD2 80.00 usec  
 PL2 -3.00 dB  
 PL12 16.00 dB  
 SF02 300.1315007 MHz

F2 - Processing parameters

SI 131072  
 SF 75.4678212 MHz  
 MDW EM  
 SSB 0  
 LB 0.50 Hz  
 GB 0  
 PC 1.40

1D NMR plot parameters

CX 22.00 cm  
 CY 0.00 cm  
 F1P 215.993 ppm  
 F1 16300.49 Hz  
 F2P -21.817 ppm  
 F2 -1646.48 Hz  
 PPMCM 10.80953 ppm/cm  
 HZCM 815.77130 Hz/cm

<sup>13</sup>C NMR (75 MHz, CS<sub>2</sub>/DMSO-d<sub>6</sub>) of compound 7a

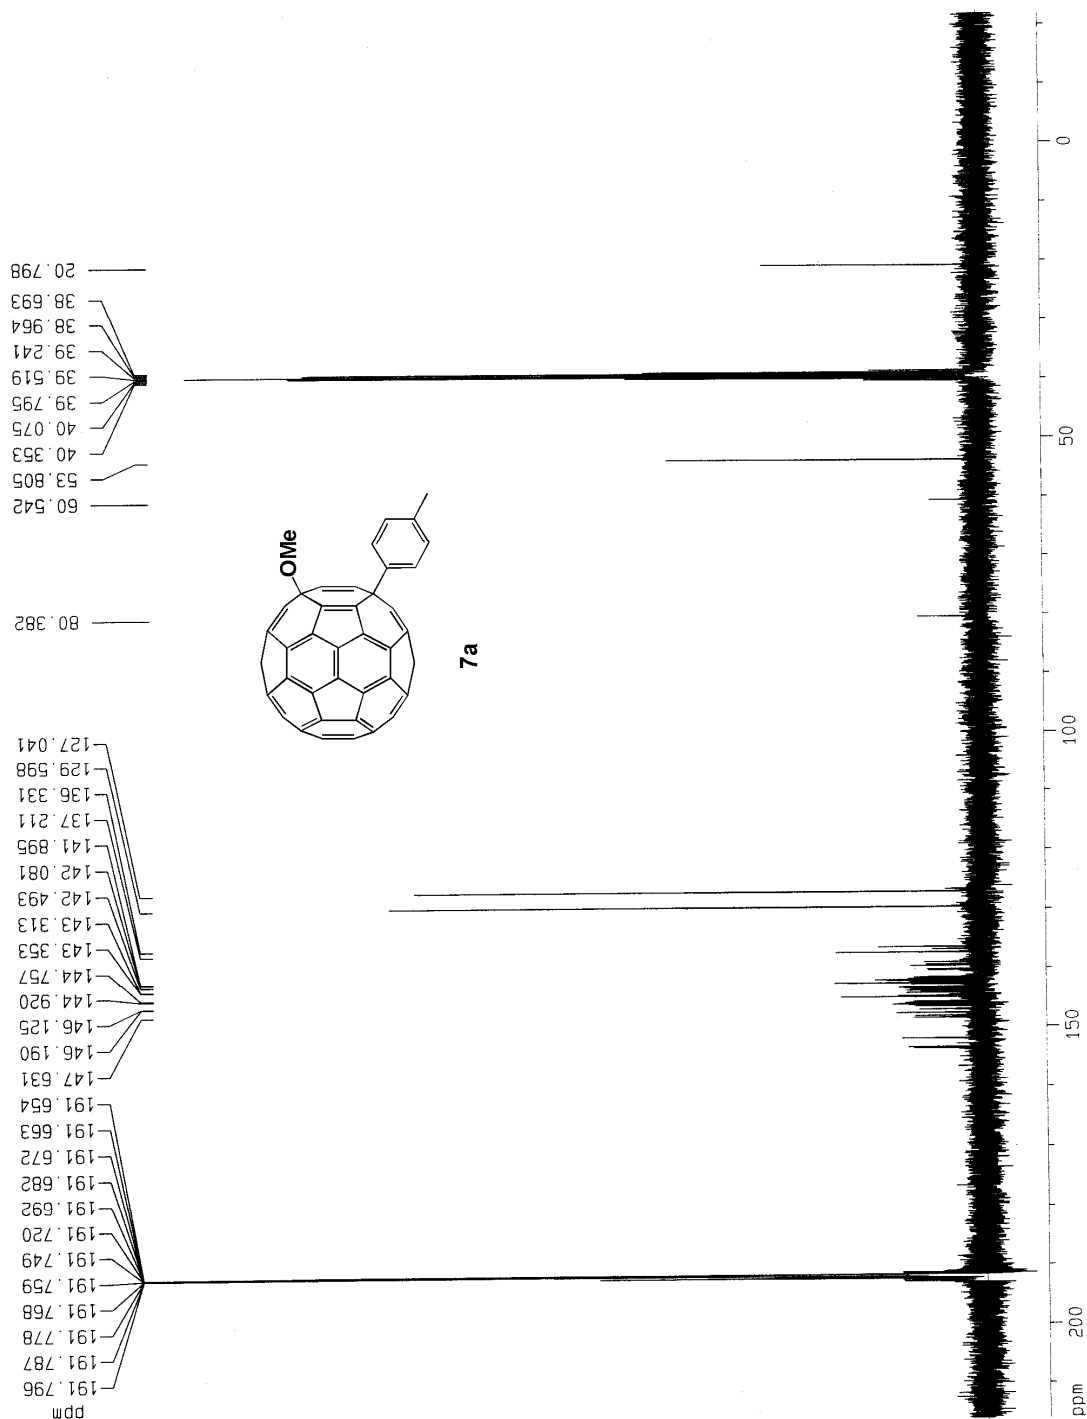

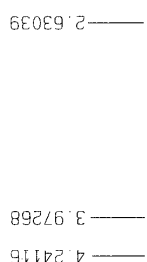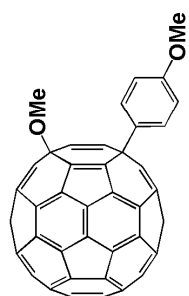

7b

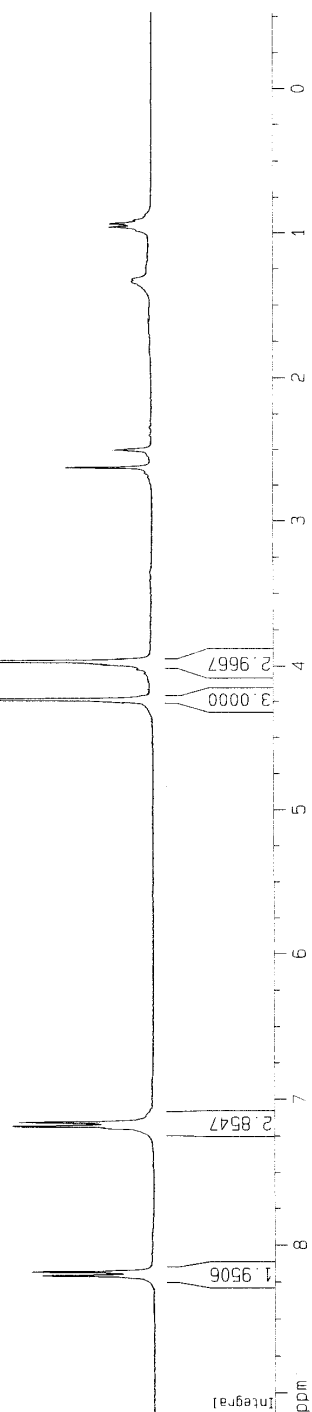

| Current Data Parameters |           |
|-------------------------|-----------|
| NAME                    | lym060706 |
| EXPNO                   | 1         |
| PROCNO                  | 1         |

F2 - Acquisition Parameters

|       |          |
|-------|----------|
| Date_ | 20060706 |
| Time  | 14.59    |

|         |                |
|---------|----------------|
| INSTRUM | av300          |
| PROBHD  | 5 mm B80 B8-1H |
| PULPROG | z9             |
| TD      | 65536          |
| SOLVENT | DMSO           |
| NS      | 49             |

|        |                |
|--------|----------------|
| DS     | 1              |
| SMH    | 5995.204 Hz    |
| FIDRES | 0.091480 Hz    |
| AQ     | 5.4657526 sec  |
| RG     | 362            |
| RDW    | 83.400 usec    |
| DE     | 6.00 usec      |
| TE     | 300.0 K        |
| D1     | 2.00000000 sec |
| MCFAST | 0.00000000 sec |
| MCWARK | 0.01500000 sec |

```
===== CHANNEL f1 =====
NUC1      1H
P1        7.50 usec
PL1       -3.00 dB
SF01      300.1321009 MHz
```

| F2 - Processing parameters |                 |
|----------------------------|-----------------|
| SI                         | 16384           |
| SF                         | 300.1300011 MHz |
| WDW                        | no              |
| SSB                        | 0               |
| LB                         | 0.00 Hz         |
| GB                         | 0               |
| PC                         | 1.00            |

| 4D NMR plot parameters |                 |
|------------------------|-----------------|
| CX                     | 22.00 cm        |
| CY                     | 0.00 cm         |
| F1P                    | 9.137 ppm       |
| F1                     | 2742.18 Hz      |
| F2P                    | -0.527 ppm      |
| F2                     | -158.10 Hz      |
| PCPM                   | 0.43025 ppm/cm  |
| PCMC                   | 131.83076 Hz/cm |

Current Data Parameters  
 NAME 1ym060706  
 EXPNO 4  
 PROCNO 1

F2 - Acquisition Parameters  
 Date\_ 20060707  
 Time 8.04  
 INSTRUM av300  
 PROBHD 5 mm BBO BB-4H  
 PULPROG zgpg  
 TD 65536  
 SOLVENT DMSO  
 NS 15093  
 DS 4  
 SWH 22675.736 Hz  
 FIDRES 0.346004 Hz  
 AQ 1.4451188 sec  
 RG 13004  
 DW 22.050 usec  
 DE 6.00 usec  
 TE 300.0 K  
 D1 2.00000000 sec  
 d11 0.03000000 sec  
 MCREST 0.00000000 sec  
 MCWRR 0.01500000 sec

===== CHANNEL f1 =====  
 NUC1 13C  
 P1 3.00 usec  
 PL1 -1.00 dB  
 SF01 75.4768051 MHz

===== CHANNEL f2 =====  
 CPDPRG2 waltz16  
 NUC2 1H  
 PCPD2 80.00 usec  
 PL2 -3.00 dB  
 PL12 16.00 dB  
 SF02 300.1315007 MHz

F2 - Processing parameters  
 SI 131072  
 SF 75.4678890 MHz  
 WDW EM  
 SSB 0  
 LB 0.50 Hz  
 GB 0  
 PC 1.40

1D NMR plot parameters  
 CX 22.00 cm  
 CY 0.00 cm  
 F1P 215.212 ppm  
 F1 16241.56 Hz  
 F2P -6.726 ppm  
 F2 -507.56 Hz  
 ppmCM 10.08805 ppm/cm  
 HzCM 761.32373 Hz/cm

# <sup>13</sup>C NMR (75 MHz, CS<sub>2</sub>/DMSO-d<sub>6</sub>) of compound 7b

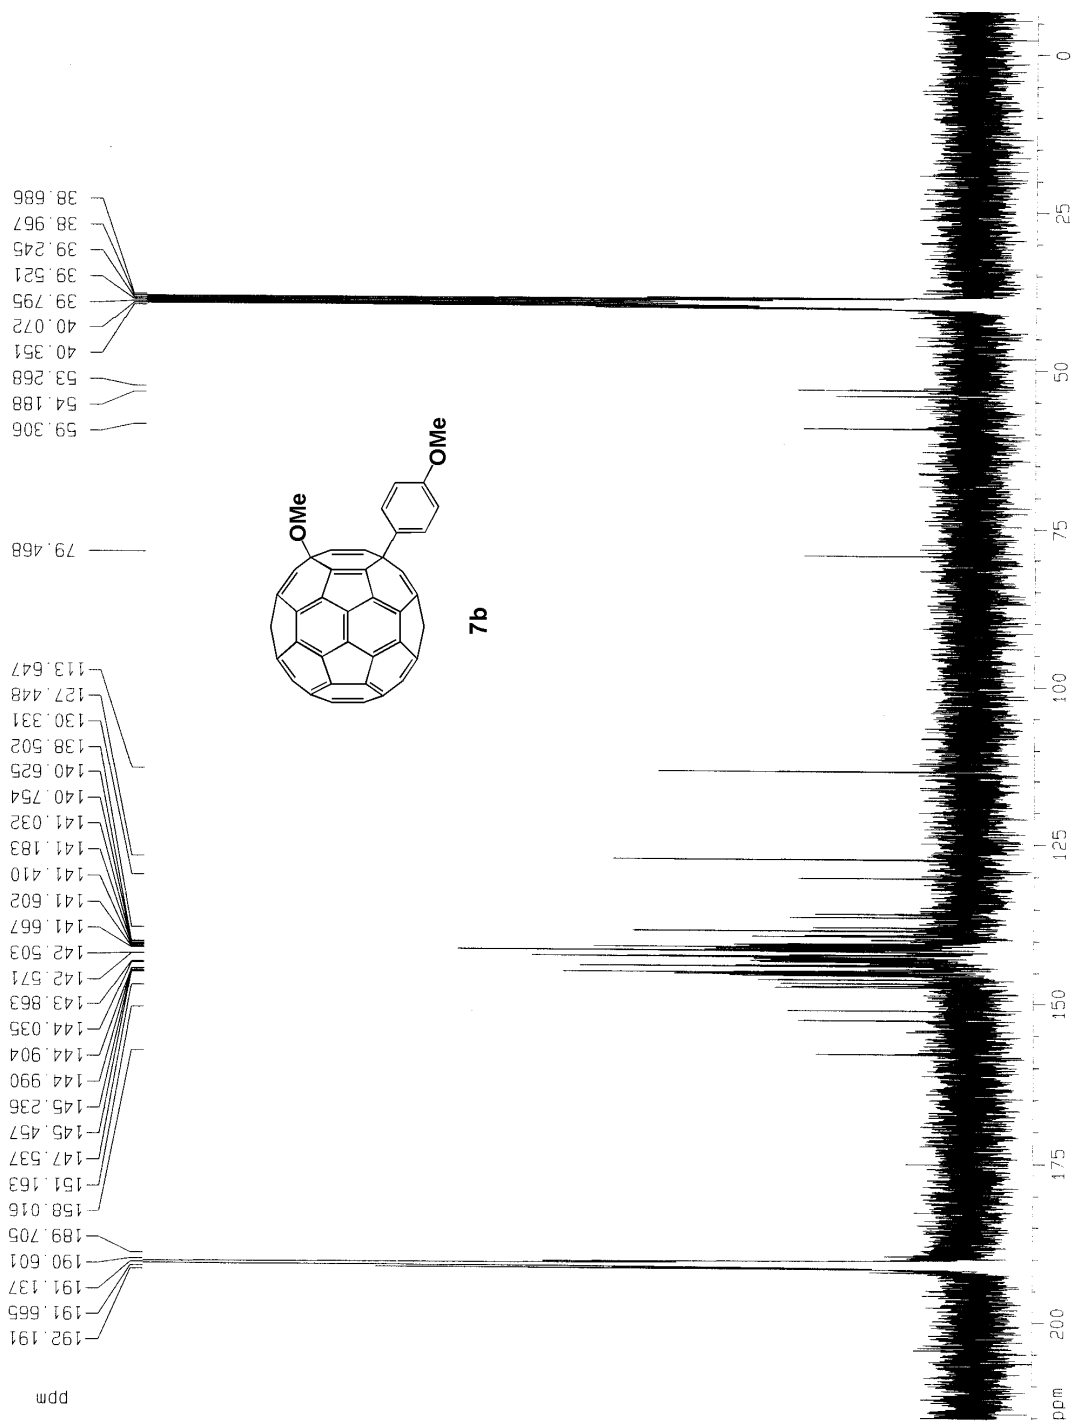



<sup>1</sup>H NMR (300 MHz, CS<sub>2</sub>/DMSO-d<sub>6</sub>) of compound 7c

8.338  
8.332  
8.318  
8.314  
8.311  
7.717  
7.692  
7.688  
7.666  
7.587  
7.563

4.253  
4.247

2.762  
2.501  
2.495

1.321  
0.968  
0.959  
0.937  
0.930

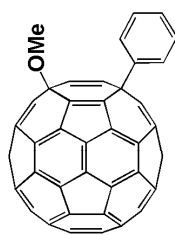

7c

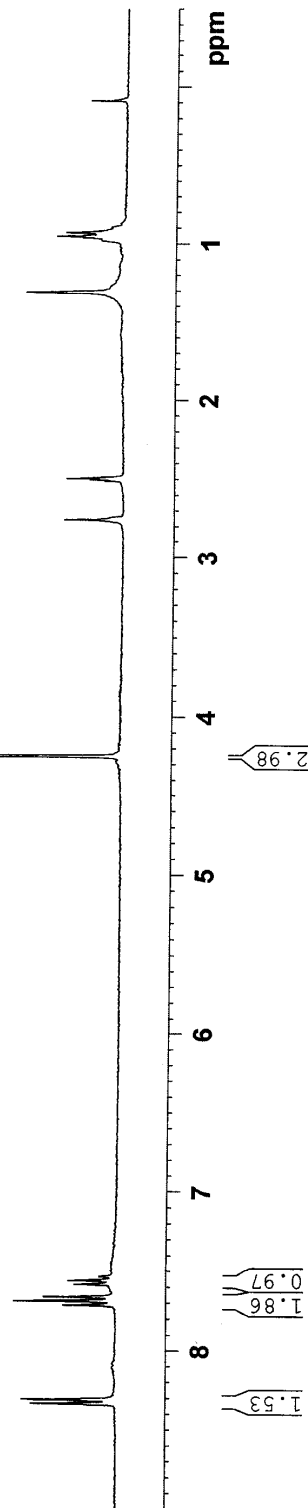

Current Data Parameters  
NAME lym070212  
EXPNO 1  
PROCNO 1  
F2 - Acquisition Parameters  
Date\_ 20070212  
Time\_ 11:17  
INSTRUM av300  
PROBHD 5 mm BBO BB-1H  
PULPROG zg  
TD 65536  
SOLVENT DMSO  
NS 32  
DS 4  
SWH 8992.806 Hz  
FIDRES 0.137219 Hz  
AQ 3.6438515 sec  
RG 406.4  
DW 55.600 usec  
DE 6.00 usec  
TE 300.0 K  
D1 2.00000000 sec  
MAGNET 0.00000000 sec  
MCPRK 0.01500000 sec  
===== CHANNEL f1 =====  
NUC1 1H  
P1 7.50 usec  
PL1 -3.00 dB  
SFO1 300.1321009 MHz  
F2 - Processing parameters  
SI 32768  
SF 300.1300017 MHz  
WDW ro  
SSB 0  
LB 0.00 Hz  
GB 0  
PC 1.00

Current Data Parameters  
NAME 1ym070212  
EXPNO 4  
PROCNO 1

F2 - Acquisition Parameters  
Date\_ 20070214  
Time 18.50  
INSTRUM av300  
PROBHD 5 mm BBO BB-1H  
PULPROG zgpg30  
TO 65536  
SOLVENT DMSO  
NS 51200  
DS 4  
SWH 22675.736 Hz  
FIDRES 0.346004 Hz  
AQ 1.4451188 sec  
RG 11585.2  
DW 22.050 usec  
DE 6.00 usec  
TE 673.2 K  
D1 2.00000000 sec  
d11 0.03000000 sec  
MCREST 0.00000000 sec  
MCMRK 0.01500000 sec

===== CHANNEL f1 =====  
NUC1 13C  
P1 3.00 usec  
PL1 -1.00 dB  
SF01 75.4768051 MHz

===== CHANNEL f2 =====  
CPDPRG2 waltz16  
NUC2 1H  
PCPD2 80.00 usec  
PL2 -3.00 dB  
PL12 16.00 dB  
SF02 300.1315007 MHz

F2 - Processing parameters  
SI 131072  
SF 75.4678191 MHz  
WDW EM  
SSB 0  
LB 0.50 Hz  
GB 0  
PC 1.40

1D NMR plot parameters  
CX 22.00 cm  
CY 4000.00 cm  
F1P 222.967 ppm  
F1 16826.81 Hz  
F2P -10.677 ppm  
F2 -805.79 Hz  
ppm 10.62018 ppm/cm  
HZCM 801.48151 Hz/cm

<sup>13</sup>C NMR (75 MHz, CS<sub>2</sub>/DMSO-*d*<sub>6</sub>) of compound 7c

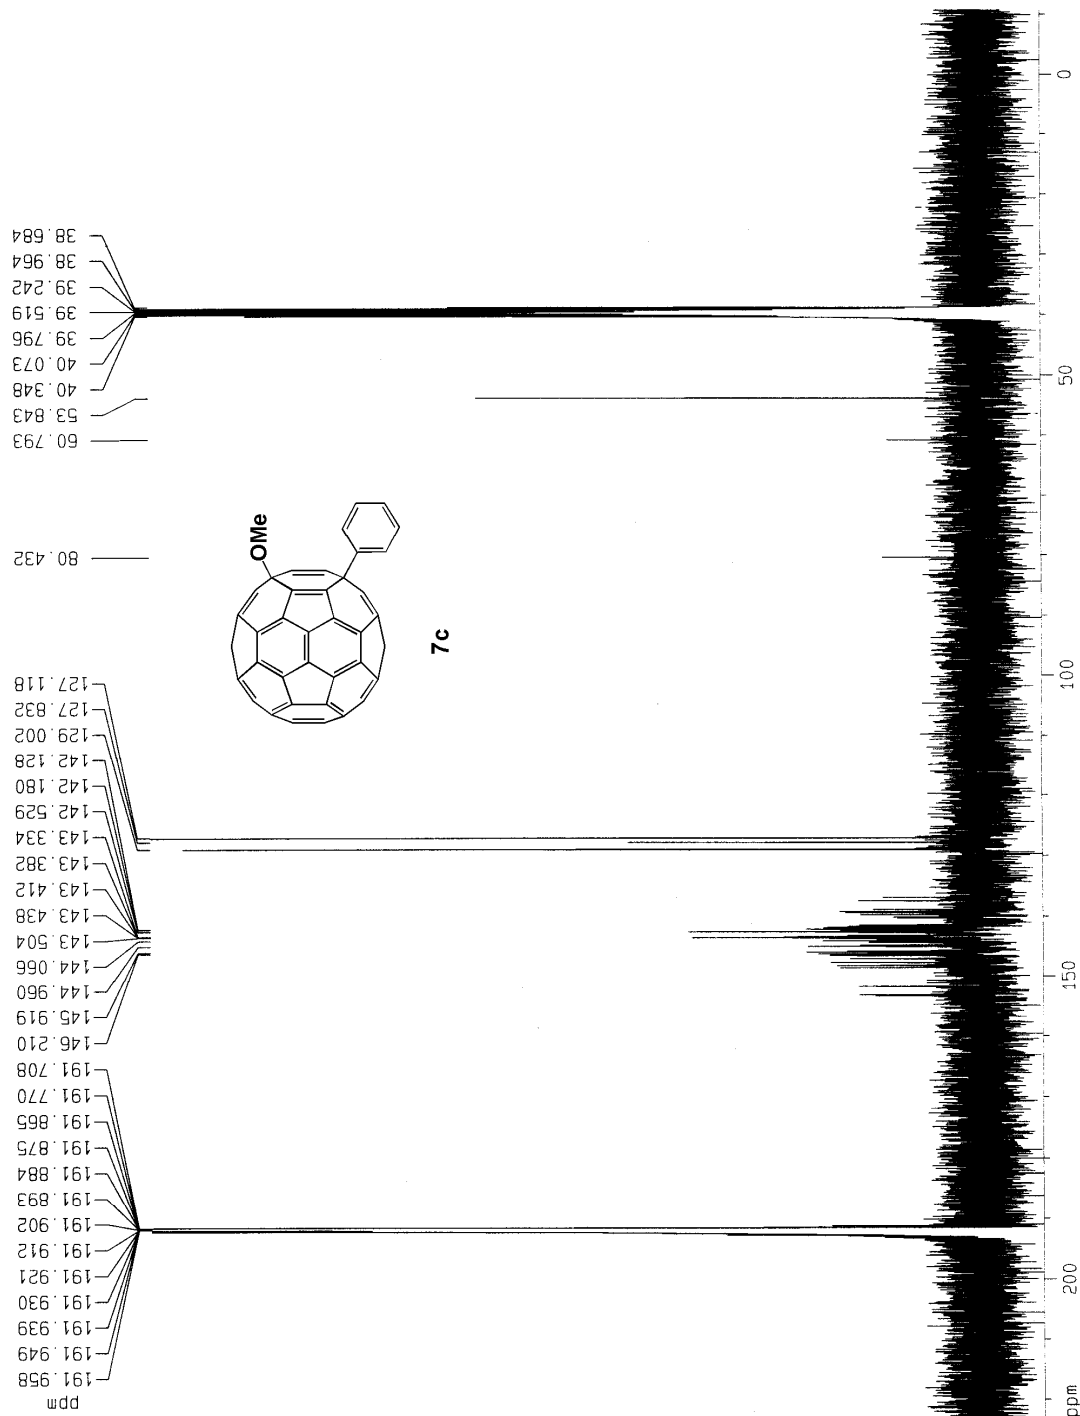

<sup>1</sup>H NMR (300 MHz, CS<sub>2</sub>/DMSO-d<sub>6</sub>) of compound 7d

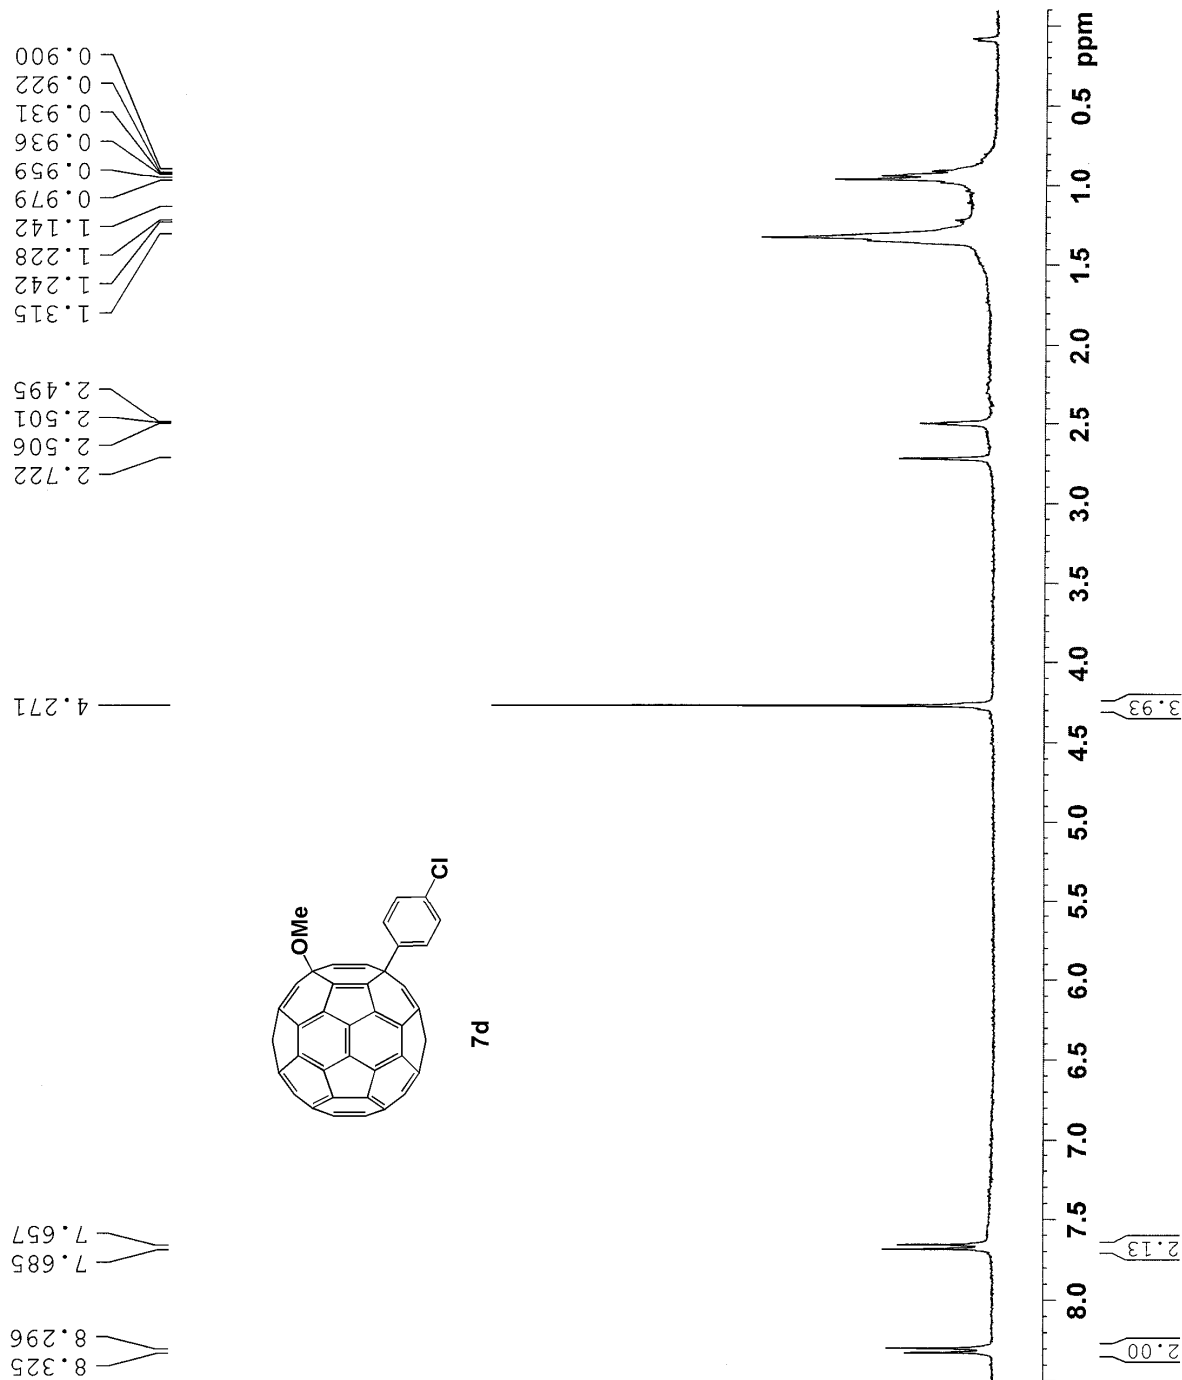

Current Data Parameters  
 NAME 1ym070115  
 EXPNO 1  
 PROCNO 1

F2 - Acquisition Parameters  
 Date\_ 20070115  
 Time 9.18  
 INSTRUM av300  
 PROBHD 5 mm BBO BB-1H  
 PULPROG zg  
 TD 65536  
 SOLVENT DMSO  
 NS 24  
 DS 1  
 SWH 8992.806 Hz  
 FIDRES 0.137219 Hz  
 AQ 3.6438515 sec  
 RG 362  
 DW 55.600 usec  
 DE 6.00 usec  
 TE 300.0 K  
 D1 2.00000000 sec  
 MCREST 0.00000000 sec  
 MCWRR 0.01500000 sec

===== CHANNEL f1 =====  
 NUC1 1H  
 P1 7.50 usec  
 PL1 -3.00 dB  
 SFO1 300.1321009 MHz

F2 - Processing parameters  
 SI 16384  
 SF 300.1300023 MHz  
 WDW no  
 SSB 0  
 LB 0.00 Hz  
 GB 0  
 PC 1.00

**<sup>13</sup>C NMR (75 MHz, CS<sub>2</sub>/DMSO-*d*<sub>6</sub>) of compound 7d**

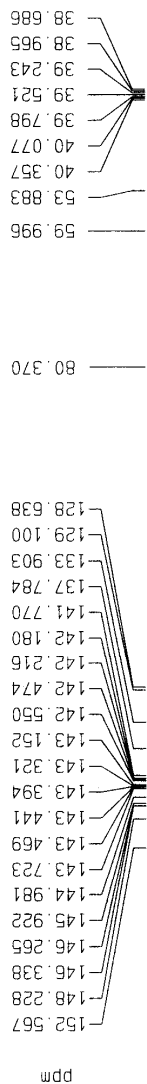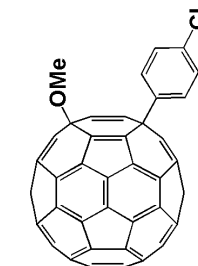

**7d**

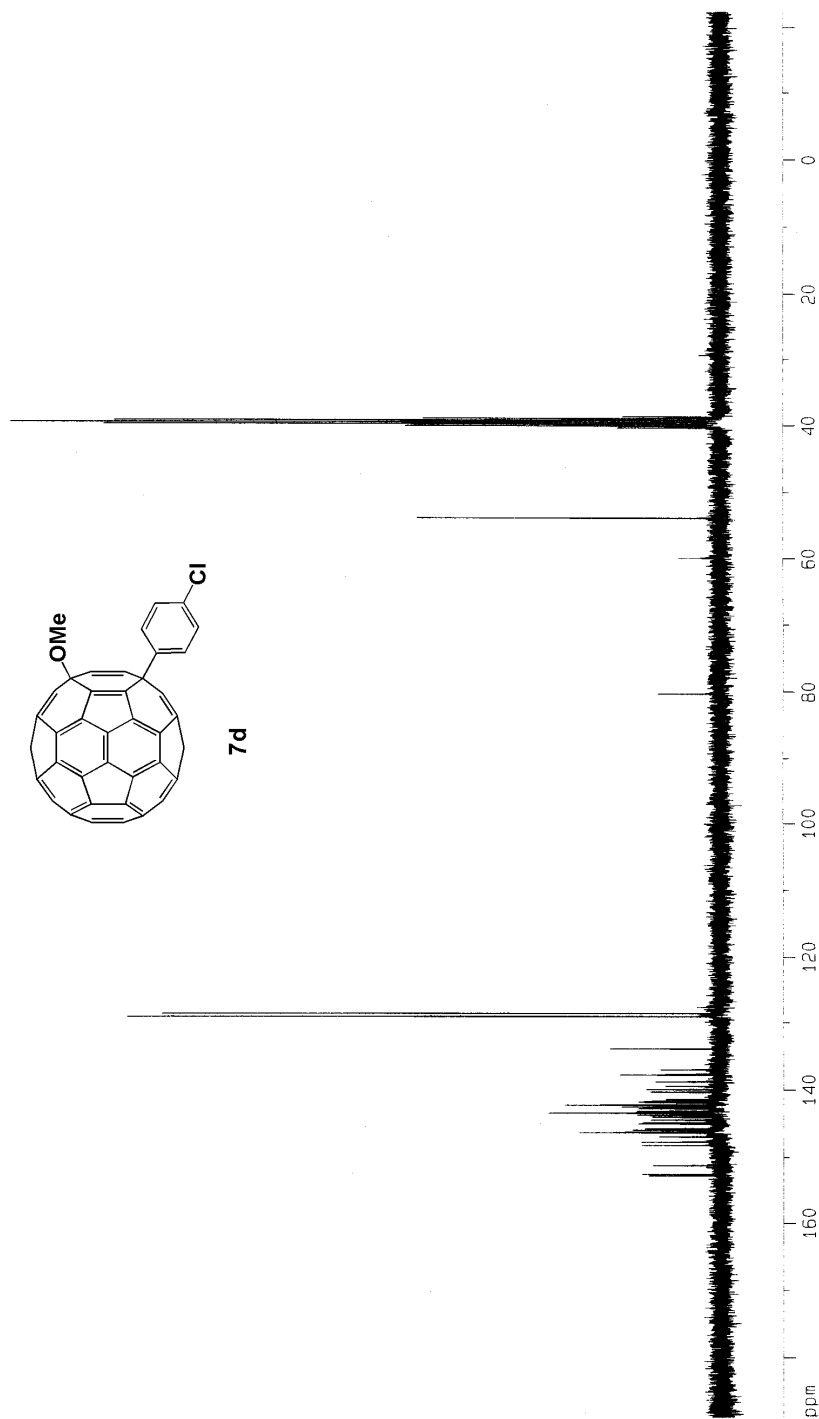

Current Data Parameters  
NAME lym070326  
EXPNO 4  
PROCNO 1

F2 - Acquisition Parameters  
Date\_ 20070327  
Time 7.52  
INSTRUM av300  
PROBHD 5 mm BBO BB-1H  
PULPROG zgpg  
TD 65536  
SOLVENT DMSO  
NS 14776  
DS 4  
SWH 22675.735 Hz  
FIDRES 0.346004 Hz  
AQ 1.4451188 sec  
RG 3649.1  
DW 22.050 usec  
DE 6.00 usec  
TE 296.0 K  
D1 2.00000000 sec  
d11 0.03000000 sec  
MCREST 0.00000000 sec  
MCWRK 0.01500000 sec

===== CHANNEL f1 =====  
NUC1 13C  
P1 3.00 usec  
PL1 -1.00 dB  
SF01 75.4768051 MHz

===== CHANNEL f2 =====  
CPDPRG2 waltz16  
NUC2 1H  
PCPD2 80.00 usec  
PL2 -3.00 dB  
PL12 16.00 dB  
SF02 300.1315007 MHz

F2 - Processing parameters  
SI 131072  
SF 75.4678183 MHz  
WDW EM  
SSB 0  
LB 0.50 Hz  
GB 0  
PC 1.40

1D NMR plot parameters  
CX 22.00 cm  
CY 0.00 cm  
F1P 188.896 ppm  
F1 14255.54 Hz  
F2 -22.271 ppm  
F2 -1660.78 Hz  
PPMCM 9.59850 ppm/cm  
HZCM 724.3787 Hz/cm

<sup>1</sup>H NMR (300 MHz, CS<sub>2</sub>/DMSO-d<sub>6</sub>) of compound 8a

8.072  
8.045  
7.435  
7.409

2.611  
2.573  
2.568  
2.528  
2.499

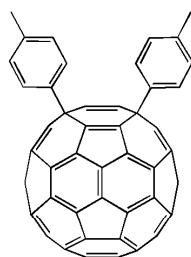

8a

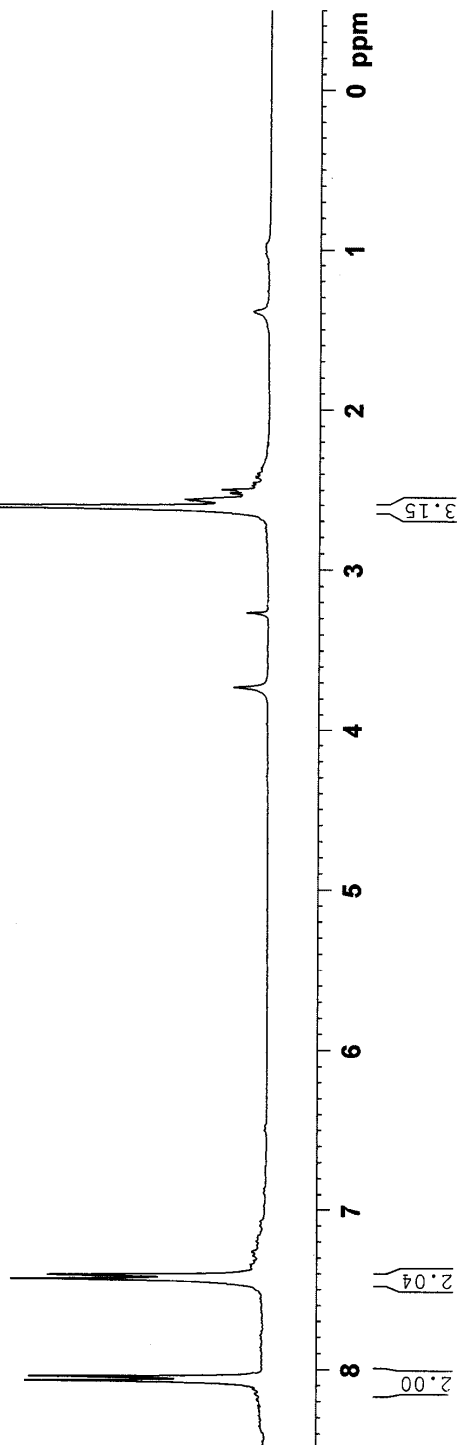

Current Data Parameters  
NAME 1ym060419  
EXPNO 1  
PROCNO 1  
F2 - Acquisition Parameters  
Date\_ 20060419  
Time 16.44  
INSTRUM spect  
PROBHD 5 mm BBO BBH-1H  
PULPROG zg  
TD 65536  
SOLVENT DMSO  
NS 65  
DS 4  
SWH 5995.204 Hz  
FIDRES 0.091480 Hz  
AQ 5.465756 sec  
RG 322.5  
DM 85.00 usec  
DE 6.00 usec  
TE 300.0 K  
D1 2.00000000 sec  
MCREST 0.00000000 sec  
MCWRR 0.01500000 sec  
===== CHANNEL f1 =====  
NUC1 1H  
P1 7.50 usec  
PL1 -3.00 dB  
SFO1 300.1321009 MHz  
F2 - Processing parameters  
SI 16384  
SF 300.1299821 MHz  
WDW no  
SSB 0  
LB 0.00 Hz  
GB 0  
FC 1.00

Current Data Parameters  
 NAME lym060419  
 EXPNO 4  
 PROCNO 1

F2 - Acquisition Parameters

Date\_ 20060421  
 Time 8.12  
 INSTRUM av300  
 PROBHD 5 mm BBO BB-1H  
 PULPROG zgpg  
 TO 65536  
 SOLVENT DMSO  
 NS 14832  
 DS 4  
 SWH 22675.736 Hz  
 FIDRES 0.346004 Hz  
 AQ 1.4451188 sec  
 RG 9195.2  
 DW 22.050 usec  
 DE 6.00 usec  
 TE 300.0 K  
 D1 2.00000000 sec  
 d11 0.03000000 sec  
 MCREST 0.00000000 sec  
 MCNPK 0.01500000 sec

===== CHANNEL f1 =====  
 NUC1 13C  
 P1 3.00 usec  
 PL1 -1.00 dB  
 SF01 75.4768051 MHz

===== CHANNEL f2 =====  
 CPDPRG2 waltz16  
 NUC2 1H  
 PCDP2 80.00 usec  
 PL2 -3.00 dB  
 PL12 16.00 dB  
 SF02 300.1315007 MHz

F2 - Processing parameters  
 SI 131072  
 SF 75.4678736 MHz  
 WDW EM  
 SSB 0  
 LB 1.00 Hz  
 GB 0  
 PC 1.40

1D NMR plot parameters  
 CX 22.00 cm  
 CY 0.00 cm  
 F1P 211.513 ppm  
 F1 15962.47 Hz  
 F2P -5.546 ppm  
 F2 -418.54 Hz  
 PPMCM 9.86634 ppm/cm  
 HZCM 744.59137 Hz/cm

<sup>13</sup>C NMR (75 MHz, CS<sub>2</sub>/DMSO-d<sub>6</sub>) of compound 8a

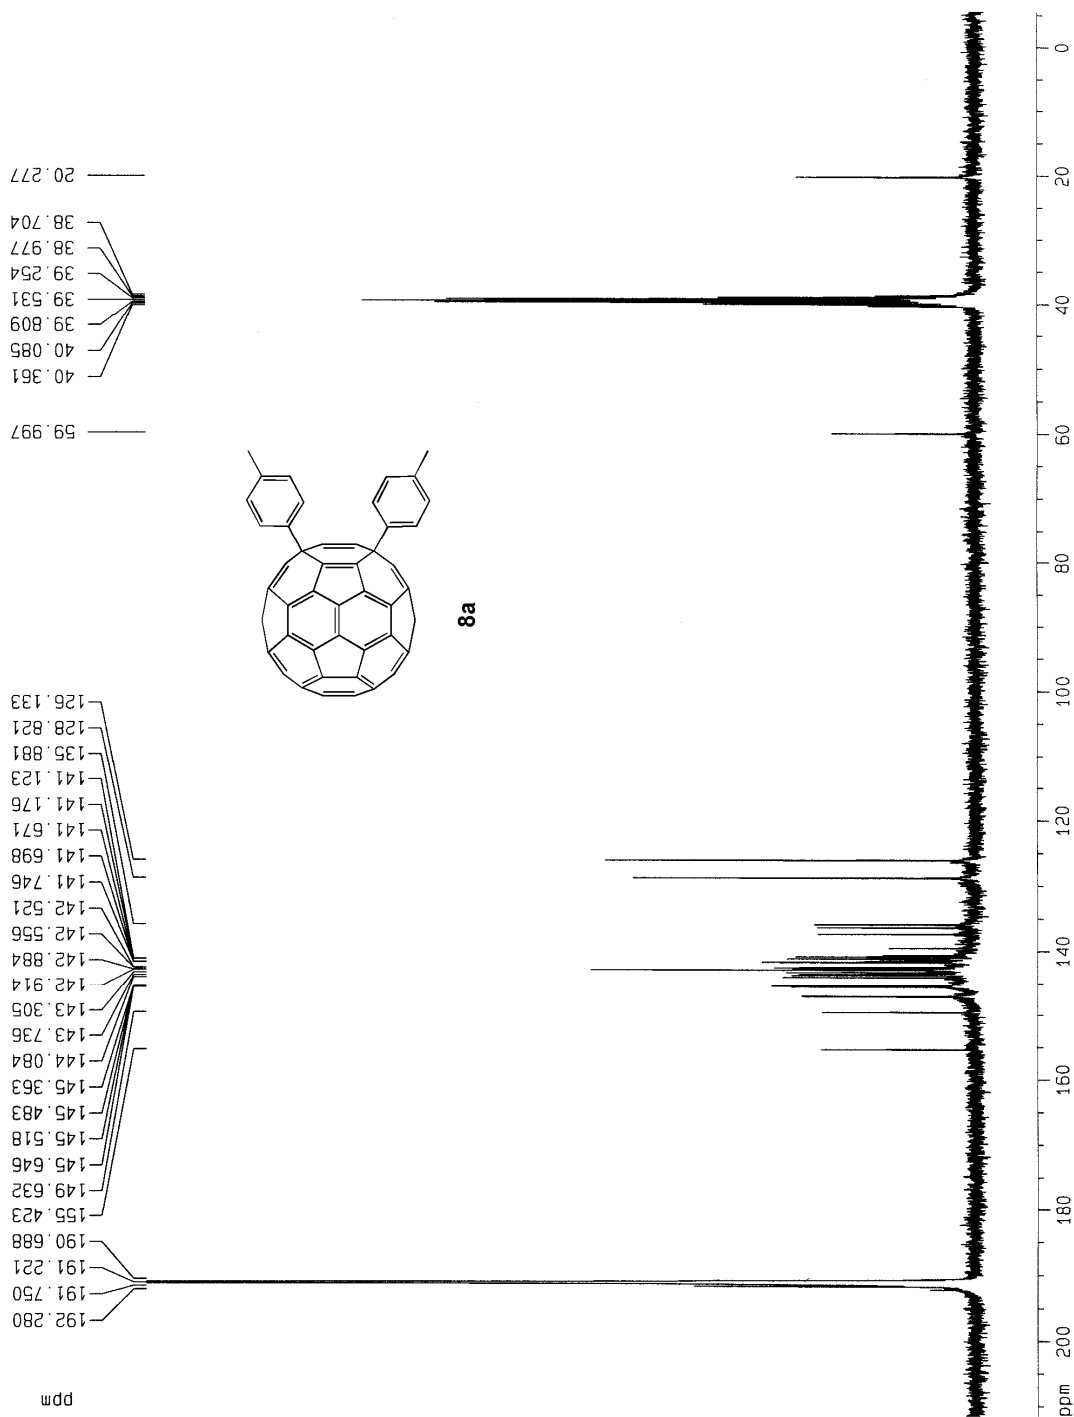

<sup>1</sup>H NMR (300 MHz, CS<sub>2</sub>/DMSO-d<sub>6</sub>) of compound 8b

8.081  
8.067  
8.060  
8.052  
8.041  
7.436  
7.410  
7.126  
7.097

3.997  
3.962  
3.949  
3.921  
3.789  
3.757

2.608  
2.558  
2.537  
2.498

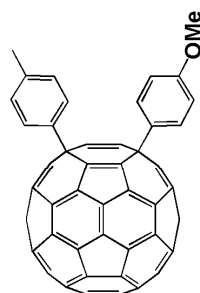

8b

Current Data Parameters  
NAME 1ym060421  
EXPNO 1  
PROCNO 1  
F2 - Acquisition Parameters  
Date\_ 20060421  
Time 17.03  
INSTRUM av300  
PROBHD 5 mm BBO BB-1H  
PULPROG zg  
TD 65536  
SOLVENT DMSO  
NS 32  
DS 1  
SWH 5995.204 Hz  
FIDRES 0.091480 Hz  
AQ 5.4657526 sec  
RG 406.4  
DW 81.400 usec  
DE 6.00 usec  
TE 300.0 K  
D1 2.00000000 sec  
MCREST 0.00000000 sec  
MCWRK 0.01500000 sec  
CHANNEL f1  
NUC1 1H  
P1 7.50 usec  
PL1 -3.00 dB  
SFO1 300.1321009 MHz  
F2 - Processing parameters  
SI 16384  
SF 300.1259632 MHz  
WDW no  
SSB 0  
LB 0.00 Hz  
GB 0  
PC 1.00

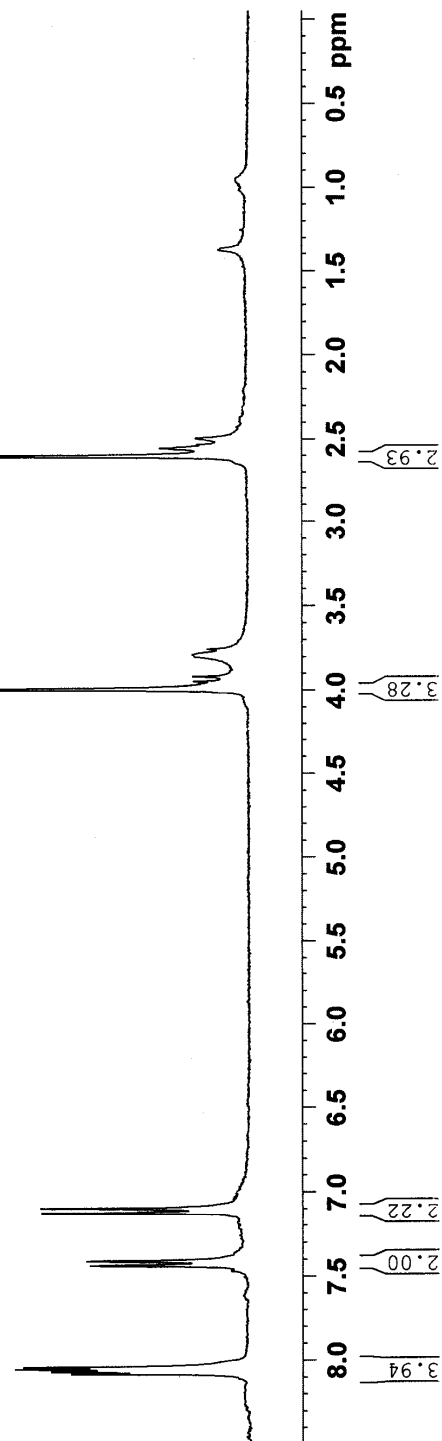

Current Data Parameters  
 NAME 1ym060421  
 EXPNO 4  
 PROCNO 1

F2 - Acquisition Parameters  
 Date\_ 20060425  
 Time 8.03  
 INSTRUM av300  
 PROBHD 5 mm BBO BB-1H  
 PULPROG zgpg  
 TD 65536  
 SOLVENT DMSO  
 NS 14944  
 DS 4  
 SWH 22675.736 Hz  
 FIDRES 0.346004 Hz  
 AQ 1.445188 sec  
 RG 4597.6  
 DW 22.050 usec  
 DE 6.00 usec  
 TE 300.0 K  
 D1 2.00000000 sec  
 d11 0.03000000 sec  
 MCREST 0.00000000 sec  
 MCWRR 0.01500000 sec

===== CHANNEL f1 =====  
 NUC1 13C  
 P1 3.00 usec  
 PL1 -1.00 dB  
 SF01 75.4768051 MHz

===== CHANNEL f2 =====  
 CPOPRG2 waltz16  
 NUC2 1H  
 PCPD2 80.00 usec  
 PL2 -3.00 dB  
 PL12 16.00 dB  
 SF02 300.1315007 MHz

F2 - Processing parameters  
 SI 131072  
 SF 75.4678539 MHz  
 MDW EM  
 SSB 0  
 LB 0.50 Hz  
 GB 0  
 PC 1.40

1D NMR plot parameters  
 CX 22.00 cm  
 CY 0.00 cm  
 F1P 209.883 ppm  
 F1 15839.39 Hz  
 F2P -4.266 ppm  
 F2 -321.97 Hz  
 PPMCM 9.73404 ppm/cm  
 HZCM 734.60712 Hz/cm

**<sup>13</sup>C NMR (75 MHz, CS<sub>2</sub>/DMSO-d<sub>6</sub>) of compound 8b**

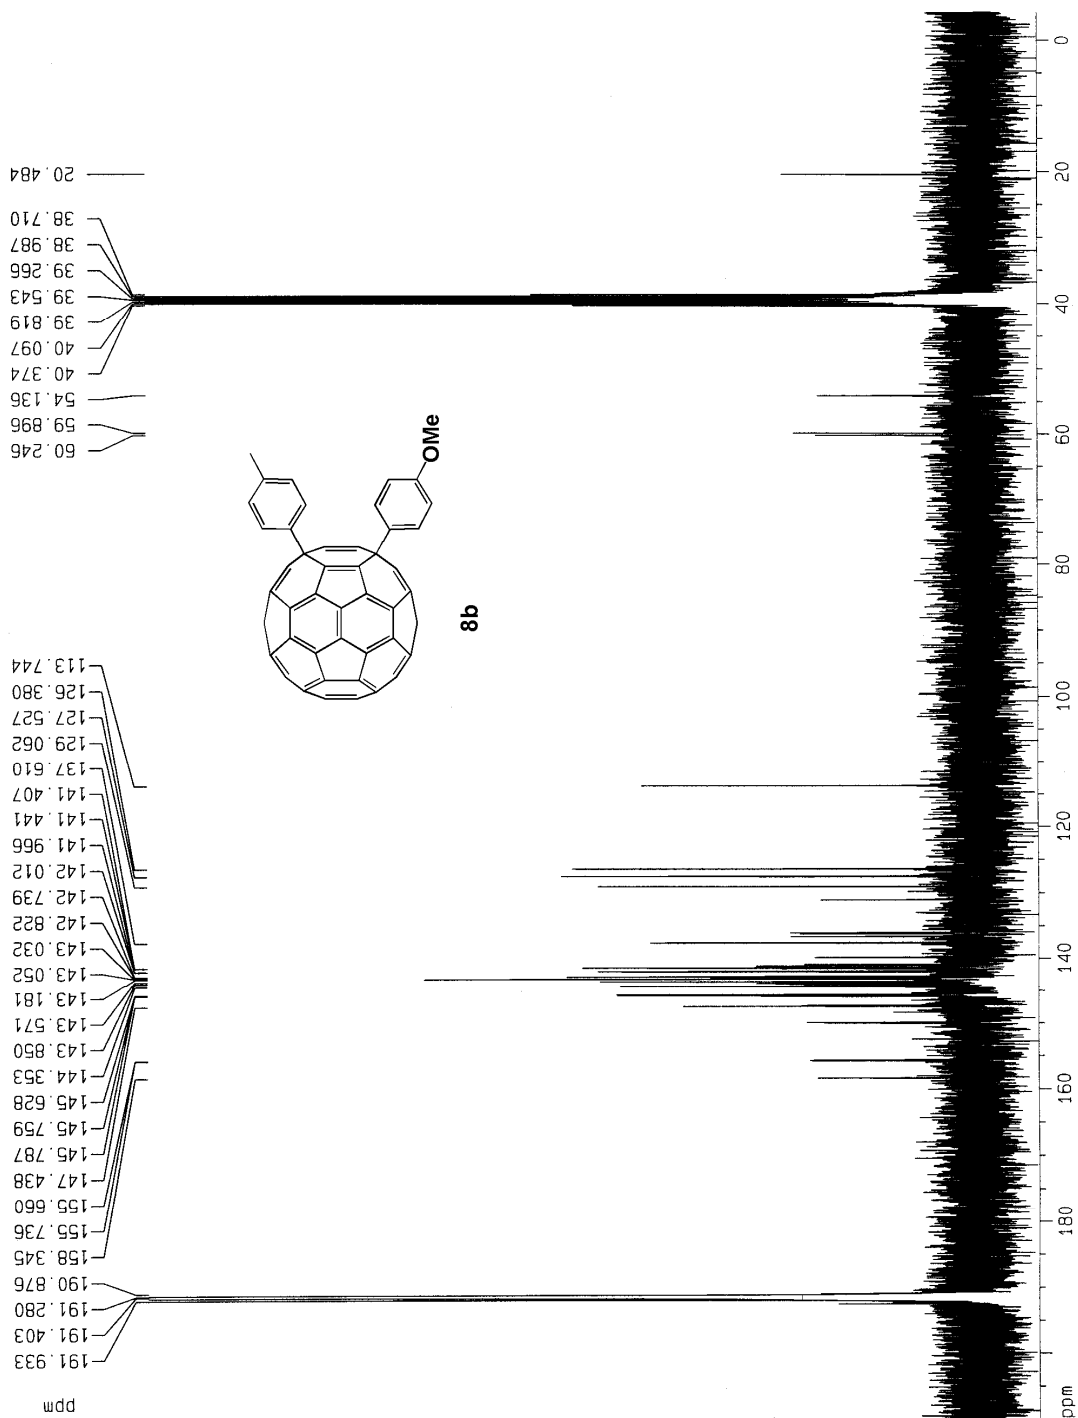



<sup>1</sup>H NMR (300 MHz, CS<sub>2</sub>/DMSO-d<sub>6</sub>) of compound 8c

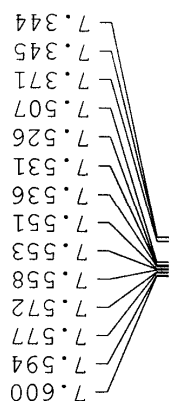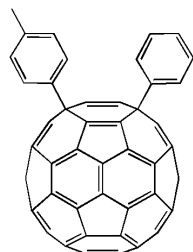

8c

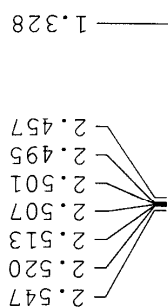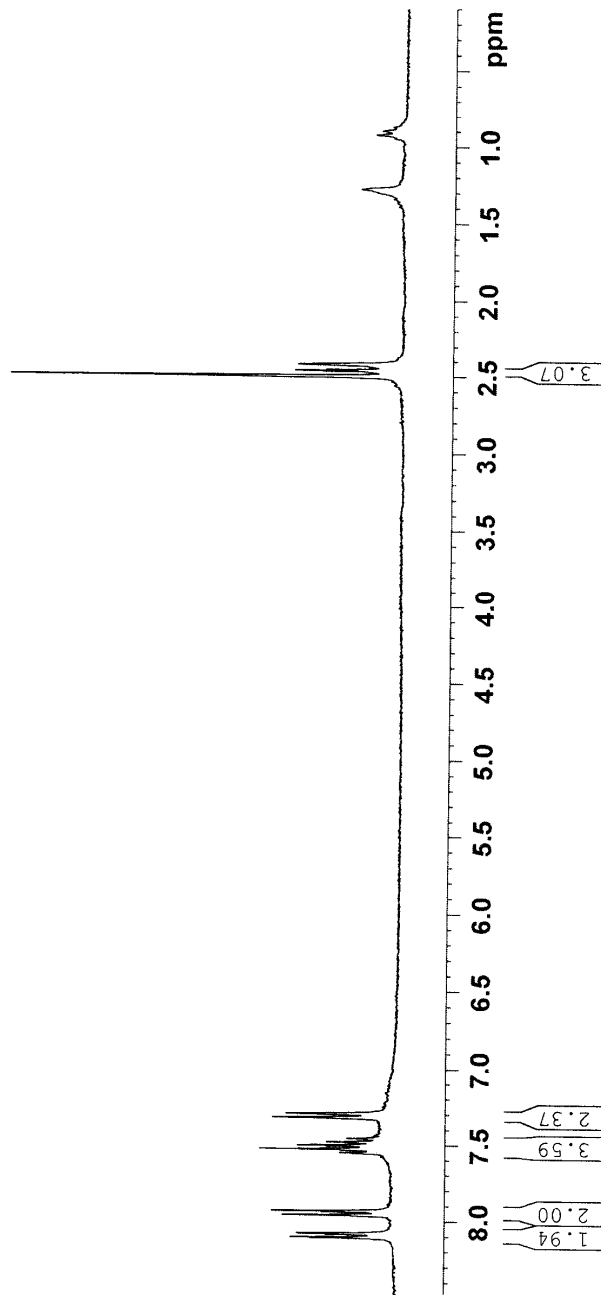

Current Data Parameters  
NAME lym06053001  
EXPNO 1  
PROCNO 1

F2 - Acquisition Parameters  
Date\_ 20060530  
Time 11.00  
INSTRUM av300  
PROBHD 5 mm BBO BB-1H  
PULPROG zg  
TD 65536  
SOLVENT DMSO  
NS 32  
DS 1  
SWH 5995.204 Hz  
FIDRES 0.091480 Hz  
AQ 5.4657526 sec  
RG 645.1  
DE 83.400 usec  
TE 300.0 K  
D1 2.0000000 sec  
MCREST 0.0000000 sec  
MCWFK 0.0150000 sec

===== CHANNEL f1 =====  
NUC1 1H  
P1 7.50 usec  
PL1 -3.00 dB  
SFO1 300.1321009 MHz

F2 - Processing parameters  
SI 16384  
SF 300.1300152 MHz  
WDW no  
SSB 0  
LB 0.00 Hz  
GB 0  
PC 1.00

Current Data Parameters  
 NAME lym050428  
 EXPNO 4  
 PROCNO 1

F2 - Acquisition Parameters  
 Date\_ 20060429  
 Time 8.12  
 INSTRUM av300  
 PROBH0 5 mm BBO BB-1H  
 PULPROG zgpg  
 TO 65536  
 SOLVENT DMSO  
 NS 14838  
 DS 4  
 SWH 22675.736 Hz  
 FIDRES 0.346004 Hz  
 AQ 1.4451188 sec  
 RG 7298.2  
 DW 22.050 usec  
 DE 6.00 usec  
 TE 300.0 K  
 D1 2.00000000 sec  
 d11 0.03000000 sec  
 MCREST 0.00000000 sec  
 MCNPK 0.01500000 sec

===== CHANNEL f1 =====  
 NUC1 13C  
 P1 3.00 usec  
 PL1 -1.00 dB  
 SF01 75.4768051 MHz

===== CHANNEL f2 =====  
 CPDPRG2 waltz16  
 NUC2 1H  
 PCDP2 80.00 usec  
 PL2 -3.00 dB  
 PL12 16.00 dB  
 SF02 300.1315007 MHz

F2 - Processing parameters  
 SI 131072  
 SF 75.4678501 MHz  
 WDW EM  
 SSB 0  
 LB 0.20 Hz  
 GB 0  
 PC 1.40

1D NMR plot parameters  
 CX 22.00 cm  
 CY 0.00 cm  
 F1P 209.461 ppm  
 F1 15807.60 Hz  
 F2P -4.216 ppm  
 F2 -318.16 Hz  
 PPMCM 9.71260 ppm/cm  
 HZCM 732.98907 Hz/cm

<sup>13</sup>C NMR (75 MHz, CS<sub>2</sub>/DMSO-d<sub>6</sub>) of compound 8c

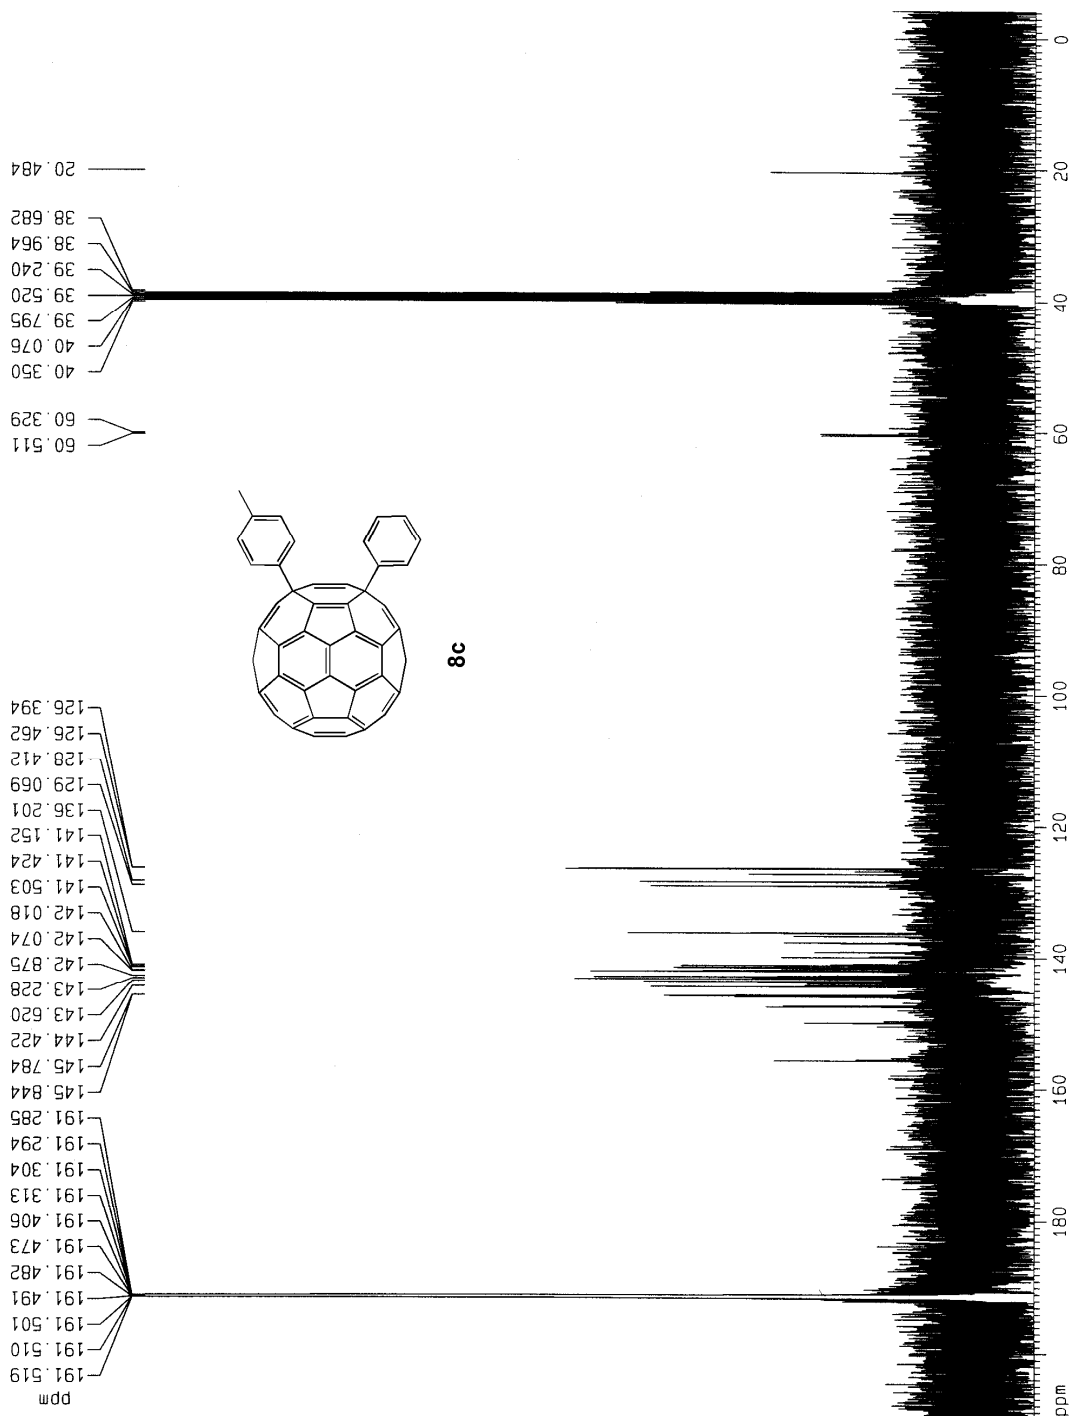

<sup>1</sup>H NMR (300 MHz, CS<sub>2</sub>/CDCl<sub>3</sub>) of compound 8d

8.081  
8.053  
8.004  
7.977  
7.516  
7.488  
7.374  
7.347  
7.261

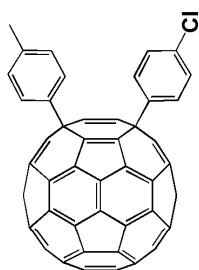

8d

2.512  
1.407  
0.037

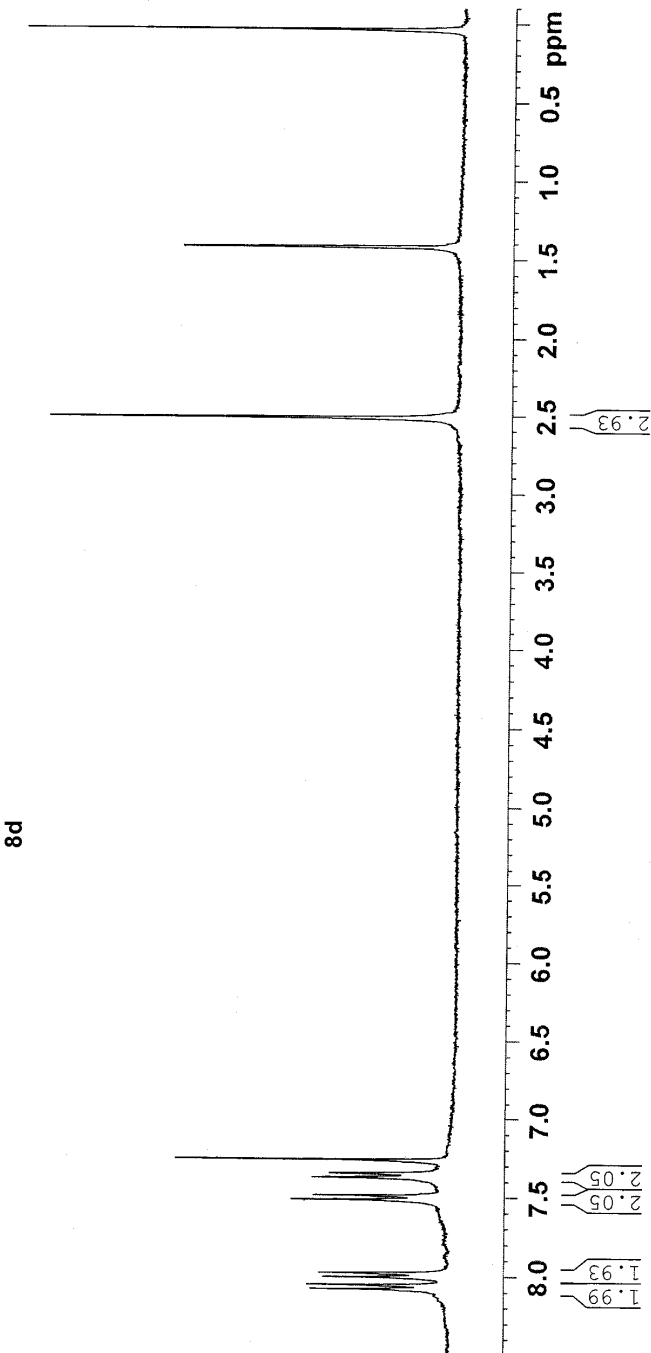

Current Data Parameters  
NAME lym060410  
EXPNO 1  
PROCNO 1  
F2 - Acquisition Parameters  
Date\_ 20060410  
Time\_ 17.17  
INSTRUM av300  
PROBHD 5 mm BBO BB-1H  
PULPROG zg  
TD 65536  
SOLVENT CDCl3  
NS 16  
DS 2  
SWH 5995.204 Hz  
FIDRES 0.091480 Hz  
AQ 5.4657526 sec  
RG 456.1  
DW 83.400 usec  
DE 6.00 usec  
TE 300.1 K  
D1 2.00000000 sec  
MCREST 0.00000000 sec  
MCWRK 0.01500000 sec  
===== CHANNEL f1 =====  
NUC1 1H  
P1 7.50 usec  
PL1 -3.00 dB  
SFO1 300.1321009 MHz  
F2 - Processing parameters  
SI 16384  
SF 300.1300066 MHz  
WDW no  
SSB 0  
LB 0.00 Hz  
GB 0  
PC 1.00

Current Data Parameters  
 NAME tym06052201  
 EXPNO 4  
 PROCNO 1

F2 - Acquisition Parameters  
 Date\_ 20060523  
 Time 7.01  
 INSTRUM av300  
 PROBD 5 mm BB0 BB-1H  
 PULPROG zgpg  
 TO 65536  
 SOLVENT DMSO  
 NS 16384  
 DS 4  
 SWH 37878.789 Hz  
 FIDRES 0.577984 Hz  
 AQ 0.8651252 sec  
 RG 10321.3  
 DW 13.200 usec  
 DE 6.00 usec  
 TE 300.0 K  
 D1 2.00000000 sec  
 d11 0.03000000 sec  
 MCREST 0.00000000 sec  
 MCWPK 0.01500000 sec

===== CHANNEL f1 =====  
 NUJC1 13C  
 P1 3.00 usec  
 PL1 -1.00 dB  
 SF01 75.4768051 MHz

===== CHANNEL f2 =====  
 CPDPRG2 waltz16  
 NUJC2 1H  
 PCPD2 80.00 usec  
 PL2 -3.00 dB  
 PL12 16.00 dB  
 SF02 300.1315007 MHz

F2 - Processing parameters  
 SI 131072  
 SF 75.4678616 MHz  
 WDW EM  
 SSB 0  
 LB 1.00 Hz  
 GB 0  
 PC 1.40

1D NMR plot parameters  
 CX 22.00 cm  
 CY 0.00 cm  
 F1P 211.721 ppm  
 F1 15978.17 Hz  
 F2P -11.354 ppm  
 F2 -856.85 Hz  
 PPMCM 10.13979 ppm/cm  
 HZCM 755.22815 Hz/cm

**<sup>13</sup>C NMR (75 MHz, CS<sub>2</sub>/DMSO-*d*<sub>6</sub>) of compound 8d**

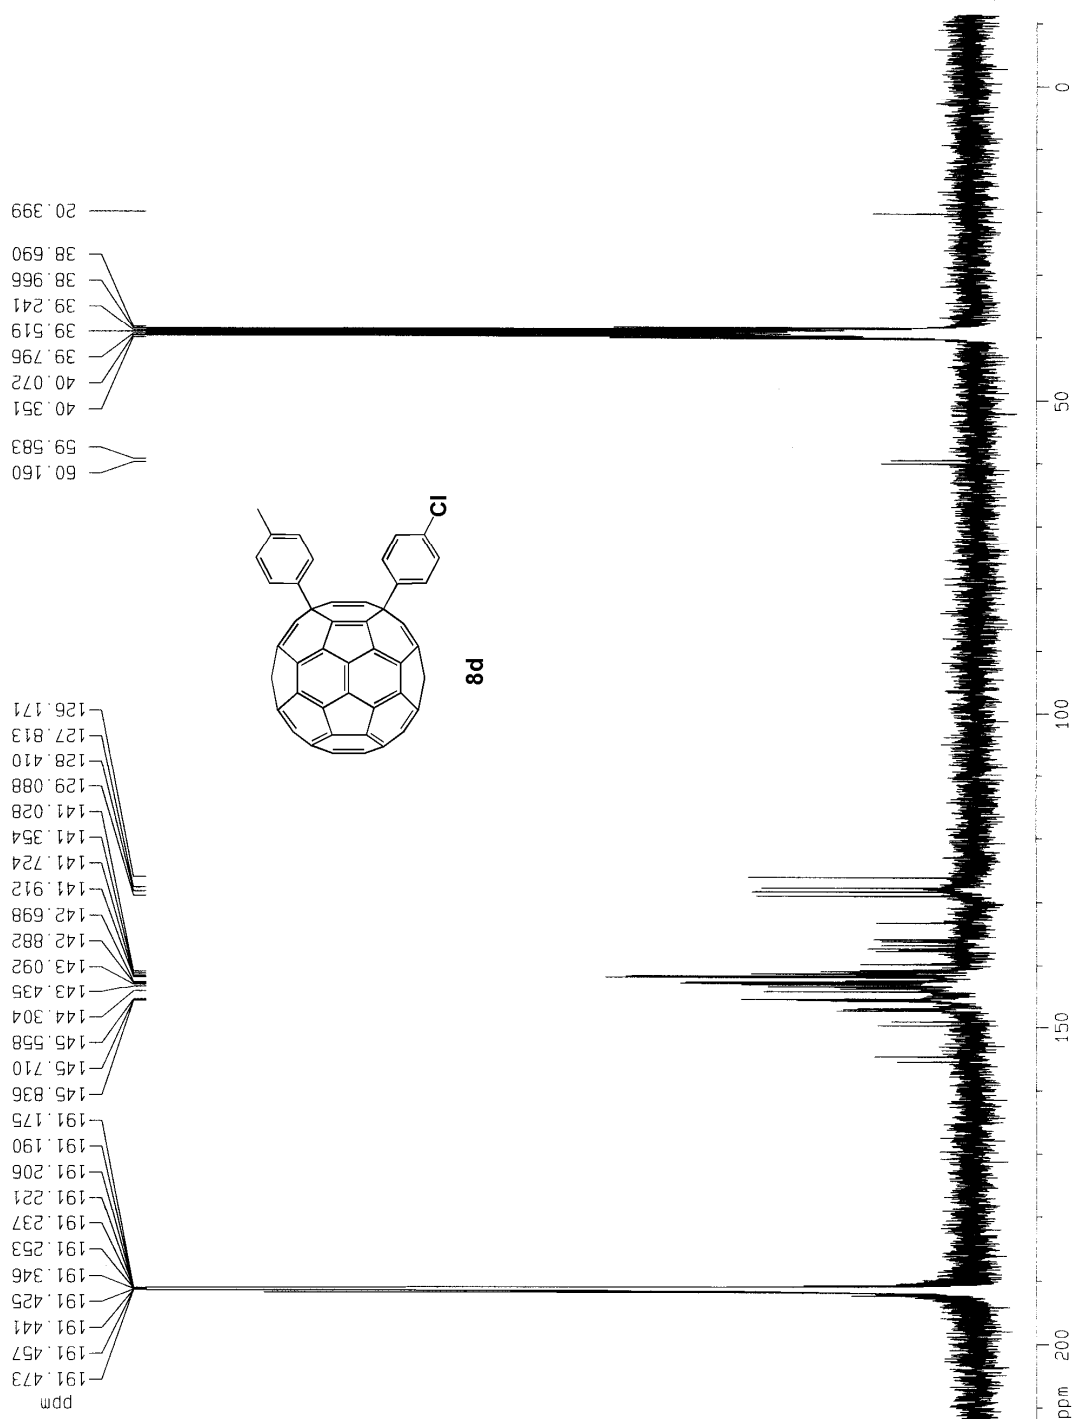

Supplement: Supplementary file 1 [file 4565335]
